# Supplementary material for: Investigation of DNA repair-related SNPs underlying susceptibility to papillary thyroid carcinoma reveals MGMT as a novel candidate gene in Belarusian children exposed to radiation
Source: BMC Cancer. 2017 May 12;17:328. doi: 10.1186/s12885-017-3314-5 (PMC5429528; doi:10.1186/s12885-017-3314-5)
Supplement: Supplementary file 1 — Annotation of the 1421 SNPs present on the Illumina SNP Cancer Panel array. (XLS 302 kb) [file 12885_2017_3314_MOESM1_ESM.xls]

## Sheet: SupplTableS1.xls
Supplemental Table S1. Annotation of the 1,421 SNPs present on the Illumina SNP Cancer Panel array.
SNP	Chromosome	Coordinate	Genome build	MAF (CEU)	MAF (CHB+JPT)	MAF (YRI)	Gene	Reference transcript	Location relative to gene	Variant type	Amino acid change	ACSN DNA repair module
rs12121543	1	11788937	35	0.271	0.161	0.1	MTHFR	NM_005957	intron			-
rs1801133	1	11790644	35	0.237	0.439	0.108	MTHFR	NM_005957	coding	non synonymous	A222V (NP_005948)	-
rs2066470	1	11797323	35	0.119	0.094	0.008	MTHFR	NM_005957	coding	Synonymous	P39P (NP_005948)	-
rs2020898	1	15565924	35	0.492	0.356	0.092	CASP9	NM_001229	intron			-
rs1052576	1	15577849	35	0.475	0.356	0.308	CASP9	NM_001229	coding	non synonymous	Q221R (NP_001220)	-
rs2020902	1	15579666	35	0.22	0.044	0.05	CASP9	NM_001229	intron			-
rs2236771	1	20050268	35	0.127	0.306	0	PLA2G2A	NM_000300	coding	Synonymous	T32T (NP_000291)	-
rs605367	1	23263830	35	0.356	0.25	0.483	HTR1D	NM_000864	3UTR			-
rs6300	1	23264939	35	0.076	0.211	0.2	HTR1D	NM_000864	coding	Synonymous	N360N (NP_000855)	-
rs676643	1	23266646	35	0.161	0.25	0.217	HTR1D	NM_000864	flanking_5UTR			-
rs760589	1	28983081	35	0.314	0.183	0.475	OPRD1	NM_000911	intron			-
rs204076	1	29011006	35	0.364	0.067	0.133	OPRD1	NM_000911	flanking_3UTR			-
rs1770810	1	43075206	35	0.263	0.122	0.167	SLC2A1	NM_006516	intron			-
rs2088102	1	45702067	35	0.407	0.367	0.425	AKR1A1	NM_006066	intron			-
rs1048771	1	46455920	35	0.153	0.272	0	RAD54L	NM_003579	coding	Synonymous	A730A (NP_003570)	HR
rs1883454	1	54071054	35	0.483	0.133	0.225	DIO1	NM_213593	flanking_5UTR			-
rs2235544	1	54087591	35	0.466	0.433	0.117	DIO1	NM_213593	intron			-
rs1887285	1	65609768	35	0.059	0	0.125	LEPR	NM_001003679	5UTR			-
rs7602	1	65609972	35	0.153	0.072	0.458	LEPR	NM_001003679	5UTR			-
rs1137100	1	65748462	35	0.339	0.172	0.117	LEPR	NM_001003679	coding	non synonymous	K109R (NP_002294)	-
rs1137101	1	65770534	35	0.458	0.122	0.392	LEPR	NM_001003679	coding	non synonymous	Q223R (NP_002294)	-
rs663465	1	70588779	35	0.432	0.278	0.433	CTH	NM_001902	flanking_5UTR			-
rs6413471	1	70599204	35	0.076	0	0.083	CTH	NM_001902	intron			-
rs473334	1	70608988	35	0.288	0.05	0.183	CTH	NM_001902	intron			-
rs663649	1	70609204	35	0.288	0.05	0.183	CTH	NM_001902	intron			-
rs559062	1	70615962	35	0.263	0.161	0.275	CTH	NM_001902	intron			-
rs515064	1	70616089	35	0.305	0.306	0.375	CTH	NM_001902	intron			-
rs540049	1	87040329	35	0.246	0.061	0.475	2015-09-01	NM_203341	3UTR			-
rs5845	1	87040860	35	0.271	0.061	0.35	2015-09-01	NM_203341	3UTR			-
rs1041163	1	100895846	35	0.076	0.139	0.175	VCAM1	NM_001078	flanking_5UTR			-
rs2392221	1	100902194	35	0.076	0.128	0.033	VCAM1	NM_001078	intron			-
rs3176879	1	100915848	35	0.017	0.156	0.342	VCAM1	NM_001078	coding	Synonymous	K736K (NP_001069)	-
rs2234696	1	109991644	35	0.051	0	0.35	GSTM3	NM_000849	3UTR			-
rs7483	1	109991743	35	0.381	0.244	0.042	GSTM3	NM_000849	coding	non synonymous	V224I (NP_000840)	-
rs1537234	1	109991863	35	0.466	0.172	0.125	GSTM3	NM_000849	intron			-
rs4659175	1	119668515	35	0.322	0.3	0.192	HSD3B2	NM_000198	flanking_5UTR			-
rs12411115	1	119672418	35	0.136	0.278	0.417	HSD3B2	NM_000198	intron			-
rs1361530	1	119677606	35	0.127	0.278	0.4	HSD3B2	NM_000198	3UTR			-
rs1417608	1	119689875	35	0.127	0.061	0.325	HSD3B2	NM_000198	flanking_3UTR			-
rs2064902	1	119730461	35	0.39	0.083	0.283	HSD3B1	NM_000862	flanking_5UTR			-
rs6667572	1	119734713	35	0.381	0.089	0.208	HSD3B1	NM_000862	flanking_5UTR			-
rs4659182	1	119737894	35	0.364	0.128	0.292	HSD3B1	NM_000862	flanking_5UTR			-
rs1998182	1	119749755	35	0.381	0.089	0.075	HSD3B1	NM_000862	flanking_5UTR			-
rs6428830	1	119766817	35	0.305	0.089	0.075	HSD3B1	NM_000862	intron			-
rs10754400	1	119770024	35	0.373	0.128	0.267	HSD3B1	NM_000862	flanking_3UTR			-
rs1889740	1	147612828	35	0.339	0.394	0.417	ARNT	NM_001668	intron			-
rs2228099	1	147621962	35	0.339	0.394	0.417	ARNT	NM_001668	coding	Synonymous	V189V (NP_848513)	-
rs1027699	1	147624785	35	0.314	0.389	0.258	ARNT	NM_001668	intron			-
rs2256355	1	147624867	35	0.339	0.394	0.417	ARNT	NM_001668	intron			-
rs2864873	1	147627247	35	0.339	0.394	0.242	ARNT	NM_001668	intron			-
rs7517566	1	147663108	35	0.144	0.167	0.058	ARNT	NM_001668	flanking_5UTR			-
rs8192284	1	151240043	35	0.347	0.428	0.042	IL6R	NM_000565	coding	non synonymous	D358A (NP_000556)	-
rs1205	1	156495306	35	0.339	0.356	0.15	CRP	NM_000567	3UTR			-
rs1800947	1	156496511	35	0.059	0.05	0	CRP	NM_000567	coding	Synonymous	L184L	-
rs1061217	1	157393088	35	0.331	0.294	0.167	SLAMF1	NM_003037	3UTR			-
rs164283	1	157403838	35	0.475	0.15	0.258	SLAMF1	NM_003037	intron			-
rs2295612	1	157429776	35	0.22	0.044	0	SLAMF1	NM_003037	coding	non synonymous	F11L (NP_003028)	-
rs6413453	1	158005389	35	0.093	0.206	0.025	APOA2	NM_001643	intron			-
rs5085	1	158005584	35	0.178	0.267	0.042	APOA2	NM_001643	intron			-
rs5082	1	158006756	35	0.407	0.067	0.217	APOA2	NM_001643	flanking_5UTR			-
rs15049	1	159848536	35	0.076	0.239	0.417	RGS5	NM_003617	3UTR			-
rs5361	1	166432718	35	0.076	0.017	0.017	SELE	NM_000450	coding	non synonymous	S149R (NP_000441)	-
rs929087	1	169363714	35	0.424	0.428	0	FASLG	NM_000639	intron			-
rs11072	1	179274988	35	0.305	0.15	0.192	RNASEL	NM_021133	3UTR			-
rs486907	1	179286214	35	0.407	0.278	0.058	RNASEL	NM_021133	coding	non synonymous	R462Q (NP_066956)	-
rs699244	1	180257109	35	0.076	0	0.067	NCF2	NM_000433	intron			-
rs2296164	1	180266592	35	0.449	0.35	0.35	NCF2	NM_000433	intron			-
rs2274064	1	180274044	35	0.441	0.35	0.383	NCF2	NM_000433	coding	non synonymous	K181R (NP_000424)	-
rs5275	1	183374715	35	0.373	0.178	0.333	PTGS2	NM_000963	3UTR			-
rs4648276	1	183377145	35	0.161	0.056	0.158	PTGS2	NM_000963	intron			-
rs5277	1	183379854	35	0.195	0.039	0	PTGS2	NM_000963	coding	Synonymous	V102V (NP_000954)	-
rs20417	1	183381978	35	0.178	0.061	0.408	PTGS2	NM_000963	flanking_5UTR			-
rs689466	1	183382408	35	0.144	0.494	0.075	PTGS2	NM_000963	flanking_5UTR			-
rs800292	1	193373890	35	0.195	0.422	0.167	CFH	NM_001014975	coding	non synonymous	V62I (NP_000177)	-
rs1329423	1	193378044	35	0.28	0.489	0.058	CFH	NM_001014975	intron			-
rs2300430	1	193387370	35	0.398	0.072	0.308	CFH	NM_001014975	intron			-
rs2274700	1	193414604	35	0.398	0.411	0.4	CFH	NM_000186	coding	Synonymous	A473A (NP_000177)	-
rs1065489	1	193441431	35	0.144	0.472	0.025	CFH	NM_000186	coding	non synonymous	E936D (NP_000177)	-
rs2820312	1	198600914	35	0.297	0.1	0.242	LMOD1	NM_012134	coding	non synonymous	T267M (NP_036266)	-
rs3024496	1	203330259	35	0.475	0.011	0.4	IL10	NM_000572	3UTR			-
rs3024509	1	203331692	35	0.076	0	0	IL10	NM_000572	intron			-
rs3021094	1	203333347	35	0.068	0.494	0	IL10	NM_000572	intron			-
rs3024491	1	203333441	35	0.483	0.011	0.275	IL10	NM_000572	intron			-
rs1800871	1	203335029	35	0.212	0.283	0.475	IL10	NM_000572	flanking_5UTR			-
rs1800896	1	203335292	35	0.475	0.056	0.308	IL10	NM_000572	flanking_5UTR			-
rs1800890	1	203337760	35	0.398	0.011	0.208	IL10	NM_000572	flanking_5UTR			-
rs2278651	1	208139455	35	0.483	0.428	0.225	SLC30A1	NM_021194	intron			-
rs2854461	1	222318379	35	0.288	0.494	0.058	EPHX1	NM_000120	flanking_5UTR			-
rs2854455	1	222321697	35	0.229	0.1	0.258	EPHX1	NM_000120	intron			-
rs2671272	1	222321851	35	0.229	0.1	0.233	EPHX1	NM_000120	intron			-
rs3738043	1	222322034	35	0.11	0.25	0.058	EPHX1	NM_000120	intron			-
rs2854456	1	222322094	35	0.195	0.244	0.017	EPHX1	NM_000120	intron			-
rs1051740	1	222326368	35	0.322	0.456	0.1	EPHX1	NM_000120	coding	non synonymous	Y113H (NP_000111)	-
rs2260863	1	222326509	35	0.28	0.072	0.417	EPHX1	NM_000120	intron			-
rs2234922	1	222333141	35	0.178	0.083	0.383	EPHX1	NM_000120	coding	non synonymous	H139R (NP_000111)	-
rs1051741	1	222338964	35	0.119	0.072	0.117	EPHX1	NM_000120	coding	Synonymous	N357N (NP_000111)	-
rs747659	1	222857476	35	0.22	0.317	0.383	PARP1	NM_001618	intron			BER, HR, NHEJ
rs747657	1	222857659	35	0.39	0.167	0.483	PARP1	NM_001618	intron			BER, HR, NHEJ
rs1136410	1	222862037	35	0.169	0.467	0.008	PARP1	NM_001618	coding	non synonymous	V762A (NP_001609)	BER, HR, NHEJ
rs1805415	1	222877575	35	0.169	0.467	0.092	PARP1	NM_001618	coding	Synonymous	K352K (NP_001609)	BER, HR, NHEJ
rs1805414	1	222880099	35	0.398	0.161	0.483	PARP1	NM_001618	coding	Synonymous	A284A (NP_001609)	BER, HR, NHEJ
rs1805407	1	222896568	35	0.22	0.317	0.383	PARP1	NM_001618	intron			BER, HR, NHEJ
rs1805087	1	233374541	35	0.169	0.15	0.3	MTR	NM_000254	coding	non synonymous	D919G (NP_000245)	-
rs2275566	1	233374603	35	0.373	0.183	0.042	MTR	NM_000254	intron			-
rs2275565	1	233374717	35	0.186	0.194	0.483	MTR	NM_000254	intron			-
rs735943	1	238356192	35	0.424	0.294	0.358	EXO1	NM_003686	coding	non synonymous	H354R (NP_003677)	MMR, MMEJ, HR
rs4149963	1	238361423	35	0.076	0.089	0	EXO1	NM_003686	coding	non synonymous	T439M (NP_569082)	MMR, MMEJ, HR
rs10795241	10	5094290	35	0.28	0.339	0.475	AKR1C3	NM_003739	flanking_5UTR			-
rs6601899	10	5108322	35	0.161	0.106	0.008	AKR1C3	NM_003739	flanking_5UTR			-
rs17134288	10	5122588	35	0.381	0	0.317	AKR1C3	NM_003739	flanking_5UTR			-
rs28942669	10	5125004	35	0.068	0	0.083	AKR1C3	NM_003739	flanking_5UTR			-
rs11252937	10	5125213	35	0.39	0	0.35	AKR1C3	NM_003739	flanking_5UTR			-
rs1937845	10	5126148	35	0.381	0.122	0.483	AKR1C3	NM_003739	flanking_5UTR			-
rs3763676	10	5126499	35	0.39	0	0.35	AKR1C3	NM_003739	flanking_5UTR			-
rs12529	10	5126651	35	0.398	0.122	0.483	AKR1C3	NM_003739	coding	non synonymous	H5Q (NP_003730)	-
rs2245191	10	5129815	35	0.246	0.139	0.292	AKR1C3	NM_003739	intron			-
rs2275928	10	5137909	35	0.364	0.183	0.375	AKR1C3	NM_003739	intron			-
rs10904422	10	5141228	35	0.136	0.333	0.133	AKR1C3	NM_003739	flanking_3UTR			-
rs7070041	10	5141571	35	0.246	0.211	0.15	AKR1C3	NM_003739	flanking_3UTR			-
rs7921327	10	5149453	35	0.288	0.211	0.275	AKR1C3	NM_003739	flanking_3UTR			-
rs1937920	10	5151955	35	0.246	0.211	0.417	AKR1C3	NM_003739	flanking_3UTR			-
rs3829125	10	5237784	35	0.153	0.122	0	AKR1C4	NM_001818	coding	non synonymous	S145C (NP_001809)	-
rs2296135	10	6034700	35	0.492	0.417	0.242	IL15RA	NM_002189	3UTR			-
rs2296141	10	6038665	35	0.11	0.078	0.125	IL15RA	NM_002189	intron			-
rs2228059	10	6042374	35	0.466	0.411	0.3	IL15RA	NM_002189	coding	non synonymous	N146T (NP_751950)	-
rs3136614	10	6045680	35	0.195	0.033	0.133	IL15RA	NM_002189	intron			-
rs556960	10	8134152	35	0.246	0.028	0.108	FLJ45983	NM_207423	intron			-
rs1149901	10	8134793	35	0.229	0.028	0.1	FLJ45983	NM_207423	5UTR			-
rs1269486	10	8136205	35	0.237	0.028	0.233	GATA3	NM_001002295	flanking_5UTR			-
rs10905277	10	8137374	35	0.373	0.378	0.183	GATA3	NM_001002295	5UTR			-
rs2229359	10	8140653	35	0.093	0	0	GATA3	NM_001002295	coding	Synonymous	A207A (NP_002042)	-
rs3781093	10	8141933	35	0.11	0.339	0.192	GATA3	NM_001002295	intron			-
rs570730	10	8146465	35	0.347	0.317	0.475	GATA3	NM_002051	flanking_3UTR			-
rs10752126	10	8146753	35	0.373	0.317	0.308	GATA3	NM_002051	flanking_3UTR			-
rs569421	10	8148598	35	0.186	0.3	0.475	GATA3	NM_002051	flanking_3UTR			-
rs520236	10	8149280	35	0.169	0.3	0.45	GATA3	NM_001002295	flanking_5UTR			-
rs422628	10	8151415	35	0.203	0.017	0.217	GATA3	NM_001002295	flanking_5UTR			-
rs406103	10	8151627	35	0.169	0.294	0.425	GATA3	NM_001002295	intron			-
rs528778	10	8152149	35	0.186	0.022	0.192	GATA3	NM_001002295	intron			-
rs1800858	10	42915974	35	0.254	0.489	0.017	RET	NM_020630	coding	Synonymous	A45A (NP_066124)	-
rs1800860	10	42926693	35	0.271	0.172	0.083	RET	NM_020630	coding	Synonymous	A432A (NP_066124)	-
rs4986832	10	45188034	35	0.169	0.183	0.133	ALOX5	NM_000698	flanking_5UTR			-
rs4987105	10	45189754	35	0.169	0.183	0.1	ALOX5	NM_000698	coding	Synonymous	T7T (NP_000689)	-
rs2029253	10	45211490	35	0.373	0.4	0.258	ALOX5	NM_000698	intron			-
rs1369214	10	45220735	35	0.432	0.15	0.425	ALOX5	NM_000698	intron			-
rs892691	10	45237098	35	0.373	0.128	0.3	ALOX5	NM_000698	intron			-
rs1565096	10	45244029	35	0.288	0.161	0.017	ALOX5	NM_000698	intron			-
rs1565097	10	45244262	35	0.288	0.156	0.167	ALOX5	NM_000698	intron			-
rs2228529	10	50337111	35	0.203	0.089	0.092	ERCC6	NM_000124	coding	non synonymous	Q1413R (NP_000115)	NER
rs2228527	10	50348375	35	0.203	0.089	0.133	ERCC6	NM_000124	coding	non synonymous	R1213G (NP_000115)	NER
rs2099902	10	54195855	35	0.254	0.233	0.4	MBL2	NM_000242	3UTR			-
rs10082466	10	54196628	35	0.254	0.15	0.408	MBL2	NM_000242	3UTR			-
rs930508	10	54198304	35	0.195	0.228	0.4	MBL2	NM_000242	intron			-
rs1838066	10	54199331	35	0.373	0.467	0.1	MBL2	NM_000242	intron			-
rs10824793	10	54199486	35	0.415	0.361	0.2	MBL2	NM_000242	intron			-
rs7096206	10	54201691	35	0.229	0.144	0.175	MBL2	NM_000242	flanking_5UTR			-
rs11003124	10	54201897	35	0.186	0.172	0.458	MBL2	NM_000242	flanking_5UTR			-
rs11003125	10	54202020	35	0.373	0.467	0.1	MBL2	NM_000242	flanking_5UTR			-
rs1031101	10	54203366	35	0.178	0.172	0.008	MBL2	NM_000242	flanking_5UTR			-
rs12264958	10	54203602	35	0.186	0.178	0.483	MBL2	NM_000242	flanking_5UTR			-
rs2243639	10	81691702	35	0.458	0.272	0	SFTPD	NM_003019	coding	non synonymous	T180A (NP_003010)	-
rs721917	10	81696304	35	0.415	0.417	0.308	SFTPD	NM_003019	coding	non synonymous	M31T (NP_003010)	-
rs1903858	10	89643666	35	0.356	0.461	0.458	PTEN	NM_000314	intron			-
rs701848	10	89716725	35	0.364	0.35	0.125	PTEN	NM_000314	flanking_3UTR			-
rs2234768	10	90739923	35	0.11	0.011	0	FAS	NM_000043	flanking_5UTR			-
rs1324551	10	90741496	35	0.458	0.456	0.1	FAS	NM_000043	intron			-
rs1468063	10	90765271	35	0.102	0.422	0.267	FAS	NM_152872	3UTR			-
rs4986894	10	96512355	35	0.153	0.267	0.142	CYP2C19	NM_000769	flanking_5UTR			-
rs4244285	10	96531606	35	0.153	0.267	0.142	CYP2C19	NM_000769	coding	Synonymous	P227P (NP_000760)	-
rs717620	10	101532568	35	0.229	0.239	0.042	ABCC2	NM_000392	5UTR			-
rs2273697	10	101553805	35	0.229	0.083	0.217	ABCC2	NM_000392	coding	non synonymous	V417I (NP_000383)	-
rs3740074	10	101561518	35	0.339	0.283	0.4	ABCC2	NM_000392	intron			-
ABCC2-10	10	101593996	35	0.068	0	0.058	ABCC2	NM_000392	intron			-
rs3740066	10	101594197	35	0.347	0.278	0.267	ABCC2	NM_000392	coding	Synonymous	I1324I (NP_000383)	-
rs2295780	10	102295955	35	0.153	0.106	0.033	HIF1AN	NM_017902	intron			-
rs619824	10	104571278	35	0.449	0.461	0.383	CYP17A1	NM_000102	flanking_3UTR			-
rs10883782	10	104573922	35	0.169	0.133	0.108	CYP17A1	NM_000102	flanking_3UTR			-
rs4919682	10	104574320	35	0.314	0.122	0.092	CYP17A1	NM_000102	flanking_3UTR			-
rs284849	10	104581172	35	0.237	0.233	0	CYP17A1	NM_000102	intron			-
rs4919687	10	104585238	35	0.331	0.183	0.083	CYP17A1	NM_000102	intron			-
rs743572	10	104587142	35	0.398	0.456	0.267	CYP17A1	NM_000102	5UTR			-
rs16906252	10	131155535	35	0.076	0	0	MGMT	NM_002412	5UTR			DR
rs12917	10	131396273	35	0.119	0.161	0.175	MGMT	NM_002412	coding	non synonymous	L84F (NP_002403)	DR
rs2296675	10	131454988	35	0.127	0.111	0.067	MGMT	NM_002412	intron			DR
rs2308327	10	131455160	35	0.169	0.006	0	MGMT	NM_002412	coding	non synonymous	K178R (NP_002403)	DR
rs8192766	10	135228266	35	0.093	0.478	0.467	CYP2E1	NM_000773	flanking_5UTR			-
rs2070673	10	135229448	35	0.161	0.45	0.133	CYP2E1	NM_000773	flanking_5UTR			-
rs2070676	10	135240018	35	0.102	0.156	0.308	CYP2E1	NM_000773	intron			-
rs4987059	11	626433	35	0.068	0.006	0.05	DRD4	NM_000797	flanking_5UTR			-
rs916457	11	627014	35	0.076	0.089	0.108	DRD4	NM_000797	flanking_5UTR			-
rs2230949	11	2110764	35	0.042	0	0.042	IGF2	NM_000612	3UTR			-
rs734351	11	2112789	35	0.458	0.267	0.183	IGF2	NM_000612	intron			-
rs3213223	11	2113506	35	0.161	0.067	0	IGF2	NM_000612	intron			-
rs3213221	11	2113620	35	0.458	0.267	0.267	IGF2	NM_000612	intron			-
rs3213216	11	2114755	35	0.364	0.339	0.075	IGF2	NM_000612	intron			-
rs3741212	11	2118434	35	0.297	0.056	0.392	IGF2AS	NM_016412	5UTR			-
rs1003483	11	2124119	35	0.475	0.456	0.083	IGF2AS	NM_016412	coding	Synonymous	F125F	-
rs3741211	11	2125686	35	0.398	0.294	0.467	IGF2AS	NM_016412	3UTR			-
rs708155	11	2353571	35	0.161	0.483	0.167	CD81	NM_004356	flanking_5UTR			-
rs810225	11	2361178	35	0.186	0.494	0.1	CD81	NM_004356	intron			-
rs431222	11	2864975	35	0.314	0.133	0.142	CDKN1C	NM_000076	flanking_5UTR			-
rs3751058	11	9007982	35	0.102	0.117	0.042	SCUBE2	NM_020974	intron			-
rs3751052	11	9028716	35	0.347	0.278	0.275	SCUBE2	NM_020974	intron			-
rs2003906	11	9044109	35	0.246	0.444	0.317	SCUBE2	NM_020974	intron			-
rs6256	11	13470629	35	0.127	0.128	0.05	PTH	NM_000315	coding	Synonymous	R83R (NP_000306)	-
rs6254	11	13470839	35	0.314	0.117	0.058	PTH	NM_000315	intron			-
rs177706	11	13471081	35	0.347	0.3	0.392	PTH	NM_000315	intron			-
rs2291752	11	18458304	35	0.475	0.172	0	TSG101	NM_006292	flanking_3UTR			-
rs2279900	11	18459735	35	0.212	0.45	0.058	TSG101	NM_006292	intron			-
rs2279902	11	18462208	35	0.144	0.3	0.025	TSG101	NM_006292	intron			-
rs2292176	11	18487604	35	0.127	0.206	0.25	TSG101	NM_006292	intron			-
rs12574333	11	18492791	35	0.212	0.45	0.058	TSG101	NM_006292	intron			-
rs2292179	11	18505122	35	0.144	0.3	0.017	TSG101	NM_006292	flanking_5UTR			-
rs3740616	11	33837472	35	0.254	0.144	0.067	LMO2	NM_005574	3UTR			-
rs3740617	11	33837592	35	0.483	0.45	0.442	LMO2	NM_005574	coding	Synonymous	K121K (NP_005565)	-
rs3781577	11	33863060	35	0.229	0.378	0.292	LMO2	NM_005574	intron			-
rs9282626	11	34416094	35	0.068	0	0.033	CAT	NM_001752	flanking_5UTR			-
rs769214	11	34416293	35	0.271	0.283	0.417	CAT	NM_001752	flanking_5UTR			-
rs1049982	11	34417117	35	0.271	0.283	0.4	CAT	NM_001752	5UTR			-
rs769218	11	34427255	35	0.136	0.456	0.108	CAT	NM_001752	intron			-
rs769217	11	34439484	35	0.136	0.456	0.125	CAT	NM_001752	coding	Synonymous	D389D (NP_001743)	-
rs475043	11	34450377	35	0.449	0.028	0.017	CAT	NM_001752	flanking_3UTR			-
rs2227973	11	36553889	35	0.11	0.472	0.108	RAG1	NM_000448	coding	non synonymous	K820R (NP_000439)	-
rs947894	11	67109265	35	0.39	0.144	0.375	GSTP1	NM_000852	coding	non synonymous	I105V (NP_000843)	-
rs1799811	11	67110155	35	0.119	0	0	GSTP1	NM_000852	coding	non synonymous	A114V (NP_000843)	-
rs312016	11	67838979	35	0.331	0.411	0.133	LRP5	NM_002335	intron			-
rs491347	11	67926264	35	0.203	0.256	0.433	LRP5	NM_002335	intron			-
rs607887	11	67953537	35	0.237	0.294	0.5	LRP5	NM_002335	intron			-
rs3736228	11	67957871	35	0.11	0.239	0	LRP5	NM_002335	coding	non synonymous	A1330V (NP_002326)	-
rs603965	11	69172091	35	0.475	0.467	0.158	CCND1	NM_053056	coding	Synonymous	P241P (NP_444284)	-
rs7177	11	69175296	35	0.415	0.15	0.142	CCND1	NM_053056	3UTR			-
rs678653	11	69175918	35	0.322	0.133	0.175	CCND1	NM_053056	3UTR			-
rs2075577	11	73393190	35	0.458	0.444	0.167	UCP3	NM_003356	coding	Synonymous	Y210Y (NP_003347)	-
rs1800849	11	73397813	35	0.186	0.289	0.092	UCP3	NM_003356	flanking_5UTR			-
rs1393350	11	88650694	35	0.186	0	0	TYR	NM_000372	intron			-
rs1800422	11	88657609	35	0.212	0	0	TYR	NM_000372	coding	non synonymous	R402Q (NP_000363)	-
rs1870019	11	100406683	35	0.28	0.006	0.017	PGR	NM_000926	flanking_3UTR			-
rs561650	11	100421104	35	0.076	0.239	0.042	PGR	NM_000926	intron			-
rs1042839	11	100427412	35	0.203	0.006	0	PGR	NM_000926	coding	Synonymous	H770H (NP_000917)	-
rs492457	11	100432070	35	0.263	0	0.467	PGR	NM_000926	intron			-
rs9282823	11	100437822	35	0.212	0.006	0	PGR	NM_000926	intron			-
rs1042838	11	100438622	35	0.178	0.006	0	PGR	NM_000926	coding	non synonymous	V660L (NP_000917)	-
rs660541	11	100439577	35	0.441	0.272	0.142	PGR	NM_000926	intron			-
rs516693	11	100468953	35	0.127	0.233	0.233	PGR	NM_000926	intron			-
rs572483	11	100472782	35	0.297	0.233	0.242	PGR	NM_000926	intron			-
rs543215	11	100479243	35	0.169	0.244	0.492	PGR	NM_000926	intron			-
rs613120	11	100479488	35	0.475	0.239	0.475	PGR	NM_000926	intron			-
rs565186	11	100488839	35	0.212	0.006	0	PGR	NM_000926	intron			-
rs529359	11	100499056	35	0.339	0.239	0.425	PGR	NM_000926	intron			-
rs481775	11	100499885	35	0.322	0.006	0.017	PGR	NM_000926	intron			-
rs10895068	11	100505424	35	0.492	0.194	0.225	PGR	NM_000926	5UTR			-
rs474320	11	100519759	35	0.186	0.006	0	PGR	NM_000926	flanking_5UTR			-
rs568157	11	100529492	35	0.483	0.006	0.25	PGR	NM_000926	flanking_5UTR			-
rs3758841	11	101708061	35	0.407	0.333	0.225	BIRC3	NM_001165	intron			-
rs3460	11	101713600	35	0.102	0.3	0	BIRC3	NM_001165	3UTR			-
rs1943781	11	101740351	35	0.144	0.006	0.458	BIRC2	NM_001166	intron			-
rs5854	11	102166084	35	0.356	0.122	0.2	MMP1	NM_002421	3UTR			-
rs2071230	11	102166169	35	0.051	0.167	0.375	MMP1	NM_002421	3UTR			-
rs5031036	11	102171374	35	0.085	0.017	0.15	MMP1	NM_002421	intron			-
rs10488	11	102173232	35	0.085	0.017	0.133	MMP1	NM_002421	coding	Synonymous	G105G (NP_002412)	-
rs228589	11	107598418	35	0.5	0.428	0.417	NPAT	NM_002519	intron			-
rs189037	11	107599043	35	0.5	0.4	0.175	ATM	NM_000051	5UTR			-
rs664677	11	107648392	35	0.492	0.367	0.225	ATM	NM_000051	intron			-
rs1800889	11	107668697	35	0.042	0	0	ATM	NM_000051	coding	Synonymous	P1526P (NP_000042)	-
rs1801516	11	107680672	35	0.178	0	0	ATM	NM_000051	coding	non synonymous	D1853N (NP_000042)	-
rs664143	11	107730871	35	0.492	0.422	0.325	ATM	NM_000051	intron			-
rs170548	11	107740046	35	0.22	0.344	0.017	ATM	NM_000051	flanking_5UTR			-
rs3092993	11	107740325	35	0.178	0	0	ATM	NM_000051	flanking_5UTR			-
rs4585	11	107744838	35	0.492	0.417	0.408	ATM	NM_000051	3UTR			-
rs1800497	11	112776038	35	0.229	0.439	0.45	ANKK1	NM_178510	coding	non synonymous	E713K (NP_848605)	-
rs1079597	11	112801496	35	0.169	0.456	0.175	DRD2	NM_000795	intron			-
rs1799978	11	112851561	35	0.042	0.111	0.125	DRD2	NM_000795	flanking_5UTR			-
rs2229114	11	117375088	35	0.051	0	0	IL10RA	NM_001558	coding	non synonymous	S420L (NP_001549)	-
rs9610	11	117377296	35	0.407	0.489	0.308	IL10RA	NM_001558	3UTR			-
rs558351	11	125000474	35	0.483	0.422	0.183	CHEK1	NM_001274	flanking_5UTR			-
rs491528	11	125002676	35	0.254	0.356	0.483	CHEK1	NM_001274	intron			-
rs506504	11	125030405	35	0.059	0	0	CHEK1	NM_001274	coding	non synonymous	I471V (NP_001265)	-
rs11226	12	892074	35	0.483	0.494	0.4	RAD52	NM_002879	3UTR			SSA, HR
rs6413436	12	892940	35	0.398	0.494	0.217	RAD52	NM_002879	intron			SSA, HR
rs1800692	12	6312607	35	0.297	0.4	0.025	TNFRSF1A	NM_001065	intron			-
rs887477	12	6316243	35	0.364	0.439	0.142	TNFRSF1A	NM_001065	intron			-
rs3213427	12	6799008	35	0.458	0.067	0.258	CD4	NM_000616	3UTR			-
rs2075241	12	12182746	35	0.178	0.078	0.358	LRP6	NM_002336	flanking_5UTR			-
rs3782528	12	12243333	35	0.492	0.261	0.075	LRP6	NM_002336	flanking_3UTR			-
rs7330	12	12766184	35	0.305	0.183	0.408	CDKN1B	NM_004064	3UTR			-
rs921	12	14986429	35	0.076	0.033	0	ARHGDIB	NM_001175	3UTR			-
rs2075267	12	15006368	35	0.441	0.489	0.308	ARHGDIB	NM_001175	flanking_5UTR			-
rs1045733	12	15152260	35	0.119	0.122	0.117	RERG	NM_032918	3UTR			-
rs17834986	12	15152704	35	0.119	0.122	0.117	RERG	NM_032918	3UTR			-
rs1055151	12	15153446	35	0.246	0.361	0.083	RERG	NM_032918	coding	Synonymous	N155N (NP_116307)	-
rs2193174	12	15195677	35	0.347	0.383	0.292	RERG	NM_032918	intron			-
rs3748302	12	15196294	35	0.297	0.422	0.092	RERG	NM_032918	intron			-
rs715398	12	15201331	35	0.161	0.256	0.05	RERG	NM_032918	intron			-
rs10160846	12	15201606	35	0.153	0.083	0	RERG	NM_032918	intron			-
RERG-29	12	15202141	35	0.059	0	0	RERG	NM_032918	intron			-
rs2216225	12	15234137	35	0.068	0.3	0.017	RERG	NM_032918	intron			-
rs767201	12	15262145	35	0.373	0.283	0.458	RERG	NM_032918	intron			-
rs6488766	12	15265897	35	0.381	0.289	0.475	RERG	NM_032918	flanking_5UTR			-
RERG-03	12	15268496	35	0.102	0	0	RERG	NM_032918	flanking_5UTR			-
rs1137196	12	25250236	35	0.381	0.222	0.042	KRAS	NM_004985	3UTR			-
rs13096	12	25251108	35	0.492	0.222	0.15	KRAS	NM_004985	3UTR			-
rs9266	12	25253484	35	0.492	0.222	0.225	KRAS	NM_004985	3UTR			-
rs712	12	25253819	35	0.492	0.222	0.108	KRAS	NM_004985	3UTR			-
rs1137282	12	25254044	35	0.237	0.122	0.192	KRAS	NM_004985	coding	Synonymous	D173D (NP_004976)	-
rs4246229	12	25258936	35	0.492	0.222	0.225	KRAS	NM_033360	flanking_3UTR			-
rs6487461	12	25259351	35	0.492	0.222	0.225	KRAS	NM_033360	flanking_3UTR			-
rs11047902	12	25271060	35	0.492	0.222	0.225	KRAS	NM_004985	intron			-
rs17388148	12	25273453	35	0.144	0	0	KRAS	NM_004985	intron			-
rs17329025	12	25275080	35	0.381	0.222	0.067	KRAS	NM_004985	intron			-
rs4623993	12	25276695	35	0.127	0.094	0.25	KRAS	NM_004985	intron			-
rs7133640	12	25279583	35	0.229	0.117	0.158	KRAS	NM_004985	intron			-
rs17329424	12	25282331	35	0.136	0.006	0	KRAS	NM_004985	intron			-
rs7973746	12	25282506	35	0.136	0.094	0.308	KRAS	NM_004985	intron			-
rs10505980	12	25283710	35	0.364	0.211	0.483	KRAS	NM_004985	intron			-
rs10842515	12	25284790	35	0.229	0.111	0.15	KRAS	NM_004985	intron			-
rs2970532	12	25287302	35	0.136	0.1	0.25	KRAS	NM_004985	intron			-
rs11047918	12	25288299	35	0.136	0.094	0.25	KRAS	NM_004985	intron			-
rs12226937	12	25288969	35	0.364	0.211	0.483	KRAS	NM_004985	intron			-
rs12228277	12	25289285	35	0.136	0.1	0	KRAS	NM_004985	intron			-
rs10842518	12	25291473	35	0.364	0.211	0.483	KRAS	NM_004985	intron			-
rs4368021	12	25293089	35	0.229	0.117	0.308	KRAS	NM_004985	intron			-
rs757343	12	46525942	35	0.127	0.256	0.042	VDR	NM_001017535	intron			-
rs2239185	12	46530826	35	0.424	0.344	0.458	VDR	NM_001017535	intron			-
rs12821902	12	51774460	35	0.093	0.228	0	IGFBP6	NM_002178	flanking_5UTR			-
rs822688	12	51779654	35	0.059	0.372	0.458	IGFBP6	NM_002178	intron			-
rs2280698	12	51783555	35	0.085	0.15	0.042	SOAT2	NM_003578	flanking_5UTR			-
rs2280699	12	51783965	35	0.144	0.356	0.442	SOAT2	NM_003578	intron			-
rs17123210	12	51784194	35	0.085	0.15	0.15	SOAT2	NM_003578	intron			-
rs2072052	12	56432986	35	0.364	0.294	0.058	CDK4	NM_000075	flanking_5UTR			-
rs703842	12	56449006	35	0.364	0.283	0.358	METTL1	NM_023032	3UTR			-
rs1861494	12	66837676	35	0.331	0.417	0.1	IFNG	NM_000619	intron			-
rs769412	12	67519482	35	0.059	0.022	0.125	MDM2	NM_002392	coding	Synonymous	E354E (NP_002383)	-
rs2278361	12	97545675	35	0.203	0.172	0.192	APAF1	NM_001160	flanking_5UTR			-
rs2288729	12	97570058	35	0.339	0.394	0.408	APAF1	NM_001160	intron			-
rs1007573	12	97595089	35	0.085	0.25	0.167	APAF1	NM_001160	intron			-
rs1866477	12	97622301	35	0.136	0.122	0.008	APAF1	NM_001160	intron			-
NR1H4-18	12	99425186	35	0.076	0	0	NR1H4	NM_005123	intron			-
rs35724	12	99457846	35	0.415	0.294	0.392	NR1H4	NM_005123	intron			-
rs5742714	12	101292319	35	0.076	0.194	0.092	IGF1	NM_000618	3UTR			-
rs5742694	12	101301703	35	0.212	0.194	0.233	IGF1	NM_000618	intron			-
rs978458	12	101304706	35	0.229	0.417	0.358	IGF1	NM_000618	intron			-
rs4764883	12	101308772	35	0.263	0.406	0.392	IGF1	NM_000618	intron			-
rs5742667	12	101325945	35	0.229	0.417	0.358	IGF1	NM_000618	intron			-
rs5742665	12	101326017	35	0.169	0.006	0	IGF1	NM_000618	intron			-
rs2373721	12	101329512	35	0.212	0.194	0.233	IGF1	NM_000618	intron			-
rs5742629	12	101359730	35	0.271	0.394	0.408	IGF1	NM_000618	intron			-
rs2162679	12	101373726	35	0.11	0.311	0.5	IGF1	NM_000618	intron			-
rs2238151	12	110674553	35	0.381	0.028	0	ALDH2	NM_000690	intron			-
rs11038	12	118095027	35	0.246	0.311	0.442	HSPB8	NM_014365	3UTR			-
rs3751144	12	120084959	35	0.102	0.183	0.192	P2RX7	NM_002562	coding	Synonymous	P474P (NP_002553)	-
rs989892	12	123812096	35	0.449	0.239	0.258	SCARB1	NM_005505	intron			-
rs865716	12	123815736	35	0.466	0.206	0.292	SCARB1	NM_005505	intron			-
rs4765621	12	123845595	35	0.398	0.372	0.433	SCARB1	NM_005505	intron			-
rs3924313	12	123853255	35	0.398	0.072	0.217	SCARB1	NM_005505	intron			-
rs4765181	12	123864108	35	0.314	0.311	0.283	SCARB1	NM_005505	intron			-
rs13428	13	23907441	35	0.458	0.333	0.483	PARP4	NM_006437	coding	non synonymous	G1280R (NP_006428)	-
rs6413414	13	23931200	35	0.093	0.006	0.133	PARP4	NM_006437	coding	Synonymous	T802T (NP_006428)	-
rs750771	13	23932384	35	0.11	0.344	0.308	PARP4	NM_006437	intron			-
rs1807111	13	23943158	35	0.093	0	0	PARP4	NM_006437	intron			-
rs1539096	13	23973859	35	0.458	0.406	0.442	PARP4	NM_006437	coding	Synonymous	R82R (NP_006428)	-
rs1799943	13	31788572	35	0.246	0.378	0.075	BRCA2	NM_000059	5UTR			HR, FANCONI
rs144848	13	31804729	35	0.297	0.256	0.125	BRCA2	NM_000059	coding	non synonymous	N372H (NP_000050)	HR, FANCONI
rs1801406	13	31809888	35	0.305	0.4	0.208	BRCA2	NM_000059	coding	Synonymous	K1132K (NP_000050)	HR, FANCONI
rs543304	13	31810299	35	0.237	0.183	0.167	BRCA2	NM_000059	coding	Synonymous	V1269V (NP_000050)	HR, FANCONI
rs1799955	13	31827232	35	0.178	0.4	0.208	BRCA2	NM_000059	coding	Synonymous	S2414S (NP_000050)	HR, FANCONI
rs206147	13	31857789	35	0.297	0.233	0.208	BRCA2	NM_000059	intron			HR, FANCONI
rs15869	13	31871012	35	0.297	0.217	0	BRCA2	NM_000059	3UTR			HR, FANCONI
rs1207953	13	31875532	35	0.458	0.317	0.042	CG018	NM_052818	intron			-
rs3765535	13	94613536	35	0.059	0.267	0.45	ABCC4	NM_005845	intron			-
rs2274406	13	94656997	35	0.39	0.411	0.242	ABCC4	NM_005845	coding	Synonymous	R317R (NP_005836)	-
rs4148472	13	94660874	35	0.169	0.339	0.083	ABCC4	NM_005845	intron			-
rs1047768	13	102302518	35	0.458	0.206	0.267	ERCC5	NM_000123	coding	Synonymous	H46H (NP_000114)	BER, NER
rs2227869	13	102313086	35	0.051	0.033	0.025	ERCC5	NM_000123	coding	non synonymous	C529S (NP_000114)	BER, NER
rs17655	13	102326003	35	0.271	0.483	0.458	ERCC5	NM_000123	coding	non synonymous	D1104H (NP_000114)	BER, NER
rs1805386	13	107659914	35	0.178	0	0.042	LIG4	NM_002312	coding	Synonymous	D568D (NP_002303)	NHEJ
rs1713449	14	19911547	35	0.237	0.311	0.483	TEP1	NM_007110	coding	non synonymous	V2214I (NP_009041)	-
rs1760904	14	19921869	35	0.458	0.378	0	TEP1	NM_007110	coding	non synonymous	S1195P (NP_009041)	-
rs872072	14	19928853	35	0.424	0.233	0.067	TEP1	NM_007110	intron			-
rs872074	14	19929045	35	0.153	0.039	0.292	TEP1	NM_007110	coding	Synonymous	A716A (NP_009041)	-
rs1760898	14	19942721	35	0.246	0.356	0.442	TEP1	NM_007110	coding	non synonymous	N307K (NP_009041)	-
rs1760897	14	19946093	35	0.271	0.172	0.45	TEP1	NM_007110	coding	non synonymous	S116P (NP_009041)	-
rs1760944	14	19992989	35	0.381	0.456	0.358	APEX1	NM_001641	flanking_5UTR			BER
rs3136814	14	19993137	35	0.042	0.022	0.2	APEX1	NM_001641	5UTR			BER
rs3136820	14	19994994	35	0.492	0.389	0.275	APEX1	NM_001641	coding	non synonymous	D148E (NP_001632)	BER
rs945352	14	20536621	35	0.441	0.289	0.283	SLC39A2	NM_014579	flanking_5UTR			-
rs2234636	14	20538991	35	0.305	0.356	0.117	SLC39A2	NM_014579	coding	non synonymous	F115L (NP_055394)	-
rs2229463	14	23788355	35	0.169	0.489	0.317	TGM1	NM_000359	3UTR			-
rs2855006	14	23798134	35	0.153	0.1	0.225	TGM1	NM_000359	coding	Synonymous	G382G (NP_000350)	-
C14orf25-11	14	37137599	35	0.068	0	0	FOXA1	NM_004496	flanking_5UTR			-
rs4986938	14	63769569	35	0.415	0.128	0.233	ESR2	NM_001437	flanking_3UTR			-
rs3020450	14	63838055	35	0.339	0.189	0.458	ESR2	NM_001437	flanking_5UTR			-
rs4902345	14	64473657	35	0.203	0.144	0.442	GPX2	NM_002083	flanking_3UTR			-
rs10133054	14	64473869	35	0.203	0.144	0.442	GPX2	NM_002083	flanking_3UTR			-
rs10133290	14	64474195	35	0.203	0.144	0.442	GPX2	NM_002083	flanking_3UTR			-
rs17880380	14	64474652	35	0.203	0.144	0.442	GPX2	NM_002083	flanking_3UTR			-
rs12172810	14	64475135	35	0.203	0.144	0.442	GPX2	NM_002083	flanking_3UTR			-
rs2071566	14	64476753	35	0.305	0.322	0.075	GPX2	NM_002083	intron			-
rs2737844	14	64478262	35	0.305	0.328	0.075	GPX2	NM_002083	intron			-
rs1800669	14	64478957	35	0.051	0	0	GPX2	NM_002083	intron			-
rs2296327	14	64480300	35	0.229	0.428	0.442	GPX2	NM_002083	flanking_5UTR			-
rs3825644	14	64481252	35	0.051	0.033	0.275	RAB15	NM_198686	flanking_3UTR			-
rs3742599	14	64481661	35	0.186	0.089	0.092	RAB15	NM_198686	flanking_3UTR			-
rs2277502	14	64482031	35	0.153	0.089	0	RAB15	NM_198686	flanking_3UTR			-
rs3784058	14	71482557	35	0.136	0.228	0.017	RGS6	NM_004296	intron			-
rs2238284	14	71489574	35	0.5	0.433	0.358	RGS6	NM_004296	intron			-
rs2238280	14	71495275	35	0.271	0.206	0.25	RGS6	NM_004296	intron			-
rs7101	14	74815379	35	0.195	0.478	0.05	FOS	NM_005252	5UTR			-
rs1063169	14	74816871	35	0.161	0.261	0	FOS	NM_005252	intron			-
rs4645856	14	74817011	35	0.042	0.161	0.125	FOS	NM_005252	intron			-
rs1046428	14	76864036	35	0.169	0.039	0.033	GSTZ1	NM_145870	coding	non synonymous	M82T (NP_665877)	-
rs1799796	14	103235680	35	0.314	0.322	0.125	XRCC3	NM_005432	flanking_5UTR			HR
rs1799794	14	103249020	35	0.212	0.461	0.167	XRCC3	NM_005432	5UTR			HR
rs2498799	14	104310939	35	0.263	0.456	0.067	AKT1	NM_001014431	coding	Synonymous	E242E (NP_005154)	-
rs1900758	15	25903692	35	0.237	0	0.108	OCA2	NM_000275	intron			-
rs1800407	15	25903913	35	0.068	0	0	OCA2	NM_000275	coding	non synonymous	R419Q (NP_000266)	-
rs1800404	15	25909368	35	0.136	0.433	0.092	OCA2	NM_000275	coding	Synonymous	A355A (NP_000266)	-
rs900055	15	38319876	35	0.483	0.306	0.075	PAK6	NM_020168	intron			-
rs11636097	15	38332730	35	0.364	0.044	0.05	PAK6	NM_020168	5UTR			-
rs936216	15	38344560	35	0.212	0.211	0.442	PAK6	NM_020168	intron			-
rs2242120	15	38355977	35	0.068	0.1	0.042	PAK6	NM_020168	3UTR			-
rs2242119	15	38356115	35	0.339	0.267	0.125	PAK6	NM_020168	3UTR			-
rs2619679	15	38773529	35	0.466	0.178	0.325	RAD51	NM_002875	flanking_5UTR			HR
rs1801320	15	38774820	35	0.068	0.139	0.242	RAD51	NM_002875	5UTR			HR
rs2619681	15	38776313	35	0.102	0.311	0.275	RAD51	NM_002875	intron			HR
rs2304579	15	38778445	35	0.068	0.111	0.125	RAD51	NM_002875	intron			HR
rs4924496	15	38782627	35	0.466	0.039	0.417	RAD51	NM_002875	intron			HR
rs2412546	15	38793815	35	0.466	0.178	0.325	RAD51	NM_002875	intron			HR
rs4144242	15	38794279	35	0.068	0.139	0.283	RAD51	NM_002875	intron			HR
rs2412547	15	38799987	35	0.458	0.178	0.325	RAD51	NM_133487	flanking_3UTR			HR
rs11852786	15	38811800	35	0.466	0.167	0.475	RAD51	NM_002875	flanking_3UTR			HR
rs1153829	15	43564636	35	0.288	0.161	0.467	SLC30A4	NM_013309	3UTR			-
rs4646	15	49290136	35	0.22	0.244	0.275	CYP19A1	NM_000103	3UTR			-
rs10046	15	49290278	35	0.415	0.494	0.175	CYP19A1	NM_000103	3UTR			-
rs1065779	15	49292103	35	0.415	0.494	0.183	CYP19A1	NM_000103	intron			-
rs2304463	15	49295412	35	0.415	0.478	0.15	CYP19A1	NM_000103	intron			-
rs700518	15	49316404	35	0.415	0.428	0.133	CYP19A1	NM_000103	coding	Synonymous	V80V (NP_000094)	-
rs2414096	15	49317071	35	0.415	0.428	0.133	CYP19A1	NM_000103	intron			-
rs727479	15	49321839	35	0.305	0.233	0.15	CYP19A1	NM_000103	intron			-
rs767199	15	49327679	35	0.441	0.411	0.025	CYP19A1	NM_000103	flanking_5UTR			-
rs12907866	15	49332746	35	0.475	0.428	0.067	CYP19A1	NM_000103	flanking_5UTR			-
rs6493494	15	49337127	35	0.441	0.428	0.225	CYP19A1	NM_000103	flanking_5UTR			-
rs749292	15	49346023	35	0.441	0.494	0.483	CYP19A1	NM_000103	flanking_5UTR			-
rs730154	15	49378496	35	0.195	0.378	0.25	CYP19A1	NM_031226	flanking_3UTR			-
CYP19A1-30	15	49389032	35	0.059	0.372	0.375	CYP19A1	NM_031226	flanking_3UTR			-
rs1004984	15	49400821	35	0.432	0.344	0.475	CYP19A1	NM_031226	flanking_3UTR			-
rs1004983	15	49400944	35	0.432	0.339	0.5	CYP19A1	NM_031226	flanking_3UTR			-
rs2470144	15	49409017	35	0.432	0.428	0.083	CYP19A1	NM_031226	flanking_5UTR			-
rs2445765	15	49422190	35	0.237	0.233	0.308	CYP19A1	NM_000103	flanking_5UTR			-
rs2446405	15	49434085	35	0.237	0.444	0.325	CYP19A1	NM_000103	flanking_5UTR			-
rs1058219	15	50430856	35	0.169	0.183	0.117	MYO5A	NM_000259	coding	non synonymous	R1246C (NP_000250)	-
rs2290336	15	50455027	35	0.127	0.439	0.383	MYO5A	NM_000259	intron			-
rs2242058	15	50459076	35	0.415	0.172	0.092	MYO5A	NM_000259	intron			-
rs1077834	15	56510771	35	0.263	0.5	0.467	LIPC	NM_000236	flanking_5UTR			-
rs1800588	15	56510967	35	0.254	0.494	0.467	LIPC	NM_000236	flanking_5UTR			-
rs3825776	15	56534122	35	0.373	0.461	0.375	LIPC	NM_000236	intron			-
rs1869145	15	56584791	35	0.212	0.289	0.158	LIPC	NM_000236	intron			-
rs1968687	15	56609989	35	0.076	0.372	0.25	LIPC	NM_000236	intron			-
rs1968689	15	56610077	35	0.068	0.011	0.417	LIPC	NM_000236	intron			-
rs6083	15	56625302	35	0.407	0.167	0.358	LIPC	NM_000236	coding	non synonymous	N215S (NP_000227)	-
rs2242064	15	56626564	35	0.263	0.317	0.375	LIPC	NM_000236	intron			-
rs2242066	15	56626629	35	0.195	0.239	0.217	LIPC	NM_000236	intron			-
rs6074	15	56648255	35	0.195	0.25	0.058	LIPC	NM_000236	coding	Synonymous	T479T (NP_000227)	-
rs2198843	15	72788283	35	0.11	0.467	0.408	CYP1A1	NM_000499	flanking_3UTR			-
rs4646421	15	72803245	35	0.076	0.35	0.383	CYP1A1	NM_000499	intron			-
rs2606345	15	72804229	35	0.305	0.039	0.017	CYP1A1	NM_000499	intron			-
CYP1A1-91	15	72812934	35	0.042	0.233	0.067	CYP1A1	NM_000499	flanking_5UTR			-
rs2472299	15	72820453	35	0.297	0.367	0.433	CYP1A1	NM_000499	flanking_5UTR			-
rs3129	15	77001270	35	0.305	0.056	0.083	CTSH	NM_004390	3UTR			-
rs2238335	15	89091370	35	0.042	0.083	0.242	BLM	NM_000057	intron			HR, FANCONI, TLS
rs2072352	15	89135183	35	0.305	0.3	0.4	BLM	NM_000057	intron			HR, FANCONI, TLS
rs2072351	15	89135262	35	0.297	0.261	0.442	BLM	NM_000057	intron			HR, FANCONI, TLS
rs16944831	15	89141945	35	0.059	0.083	0.342	BLM	NM_000057	intron			HR, FANCONI, TLS
rs2270132	15	89152872	35	0.347	0.456	0.075	BLM	NM_000057	intron			HR, FANCONI, TLS
rs389480	15	89152934	35	0.398	0.394	0.433	BLM	NM_000057	intron			HR, FANCONI, TLS
rs2073919	15	89154123	35	0.212	0.183	0.1	BLM	NM_000057	intron			HR, FANCONI, TLS
rs2137680	15	97130264	35	0.237	0.478	0.233	IGF1R	NM_000875	intron			-
rs2175795	15	97130377	35	0.237	0.478	0.233	IGF1R	NM_000875	intron			-
rs907806	15	97162404	35	0.076	0.183	0.308	IGF1R	NM_000875	intron			-
rs3743259	15	97260684	35	0.356	0.478	0.442	IGF1R	NM_000875	intron			-
rs3743260	15	97260815	35	0.051	0.206	0.083	IGF1R	NM_000875	intron			-
rs2229765	15	97295748	35	0.39	0.383	0.25	IGF1R	NM_000875	coding	Synonymous	E1043E (NP_000866)	-
rs9282715	15	97321359	35	0.127	0.067	0.35	IGF1R	NM_000875	flanking_3UTR			-
rs344357	16	1776256	35	0.178	0.322	0.033	NUBP2	NM_012225	intron			-
rs1065663	16	1779024	35	0.195	0.322	0.017	NUBP2	NM_012225	3UTR			-
rs344360	16	1779222	35	0.186	0.322	0.025	NUBP2	NM_012225	flanking_3UTR			-
rs2745205	16	1784227	35	0.28	0.489	0.217	IGFALS	NM_004970	flanking_5UTR			-
rs7102	16	11549743	35	0.314	0.461	0.45	LITAF	NM_004862	3UTR			-
rs4280262	16	11554993	35	0.186	0.1	0.025	LITAF	NM_004862	coding	non synonymous	I92V	-
rs1800067	16	13936534	35	0.051	0	0	ERCC4	NM_005236	coding	non synonymous	R415Q (NP_005227)	NER, MMEJ, FANCONI
rs1799800	16	13946053	35	0.254	0.267	0.108	ERCC4	NM_005236	intron			NER, MMEJ, FANCONI
rs40076	16	23599906	35	0.178	0.433	0.275	PLK1	NM_005030	intron			-
rs2057768	16	27229596	35	0.254	0.406	0.292	IL4R	NM_001008699	flanking_5UTR			-
rs3024544	16	27260858	35	0.178	0	0.117	IL4R	NM_001008699	intron			-
rs1805011	16	27281373	35	0.11	0.061	0.35	IL4R	NM_000418	coding	non synonymous	E400A (NP_000409)	-
rs1805012	16	27281465	35	0.11	0.061	0.083	IL4R	NM_000418	coding	non synonymous	C431R (NP_000409)	-
rs1805015	16	27281681	35	0.161	0.067	0.4	IL4R	NM_000418	coding	non synonymous	S503P (NP_000409)	-
rs1801275	16	27281901	35	0.212	0.117	0.108	IL4R	NM_000418	coding	non synonymous	Q576R (NP_000409)	-
rs1805016	16	27282428	35	0.051	0	0.408	IL4R	NM_000418	coding	non synonymous	S752A (NP_000409)	-
rs8832	16	27283288	35	0.381	0.4	0.125	IL4R	NM_000418	3UTR			-
rs3194168	16	28510513	35	0.119	0	0.1	LOC112869	NM_138414	coding	Synonymous	E289E (NP_612423)	-
rs2066850	16	49287730	35	0.39	0	0.008	CARD15	NM_022162	flanking_5UTR			-
rs2067085	16	49291360	35	0.39	0.039	0.25	CARD15	NM_022162	coding	Synonymous	S178S (NP_071445)	-
rs2066843	16	49302700	35	0.364	0	0	CARD15	NM_022162	coding	Synonymous	R459R (NP_071445)	-
rs748855	16	49308899	35	0.381	0.222	0.142	CARD15	NM_022162	intron			-
rs1077861	16	49317048	35	0.246	0.222	0.15	CARD15	NM_022162	intron			-
rs820299	16	55557785	35	0.314	0.461	0.392	CETP	NM_000078	intron			-
rs289717	16	55566889	35	0.331	0.389	0.133	CETP	NM_000078	intron			-
rs1801706	16	55575163	35	0.195	0.139	0.158	CETP	NM_000078	3UTR			-
rs5923	16	66531454	35	0.042	0	0.208	LCAT	NM_000229	coding	Synonymous	L393L (NP_000220)	-
rs4986970	16	66533821	35	0.051	0	0	LCAT	NM_000229	coding	non synonymous	S232T (NP_000220)	-
rs1109166	16	66534883	35	0.161	0.122	0.175	LCAT	NM_000229	intron			-
rs9282650	16	67367141	35	0.246	0.211	0.275	CDH1	NM_004360	intron			-
rs1801552	16	67414942	35	0.407	0.4	0.058	CDH1	NM_004360	coding	Synonymous	A692A (NP_004351)	-
rs1801026	16	67424957	35	0.178	0.167	0.15	CDH1	NM_004360	3UTR			-
rs251796	16	67952935	35	0.229	0.344	0.008	TERF2	NM_005652	intron			-
rs153045	16	67954894	35	0.288	0.406	0.033	TERF2	NM_005652	intron			-
TERF2-03	16	67960069	35	0.22	0	0.025	TERF2	NM_005652	intron			-
rs10517	16	68301261	35	0.102	0.333	0.108	NQO1	NM_000903	3UTR			-
rs689453	16	68309874	35	0.068	0.006	0.067	NQO1	NM_000903	coding	Synonymous	E24E (NP_000894)	-
rs689452	16	68309965	35	0.076	0.328	0.108	NQO1	NM_000903	intron			-
rs723012	16	80676273	35	0.288	0.089	0.025	HSD17B2	NM_002153	intron			-
rs1424151	16	80686853	35	0.059	0.133	0.1	HSD17B2	NM_002153	intron			-
rs904797	16	87057132	35	0.314	0.433	0.367	ZFPM1	NM_153813	intron			-
rs1061646	16	88333478	35	0.407	0.2	0.358	FANCA	NM_000135	intron			FANCONI, TLS
rs7195906	16	88333848	35	0.432	0.011	0.108	FANCA	NM_000135	intron			FANCONI, TLS
rs1800345	16	88342718	35	0.39	0.183	0.35	FANCA	NM_000135	intron			FANCONI, TLS
rs12931267	16	88346233	35	0.144	0.028	0	FANCA	NM_000135	intron			FANCONI, TLS
rs2159116	16	88359011	35	0.229	0	0	FANCA	NM_000135	intron			FANCONI, TLS
rs7203907	16	88361275	35	0.432	0.011	0.258	FANCA	NM_000135	intron			FANCONI, TLS
rs886951	16	88364366	35	0.424	0.011	0.233	FANCA	NM_000135	intron			FANCONI, TLS
rs3785275	16	88369530	35	0.398	0.206	0.292	FANCA	NM_000135	intron			FANCONI, TLS
rs2016571	16	88371777	35	0.398	0.211	0.3	FANCA	NM_000135	intron			FANCONI, TLS
rs2239359	16	88376981	35	0.381	0.183	0.325	FANCA	NM_000135	coding	non synonymous	G501S (NP_000126)	FANCONI, TLS
rs2239360	16	88377084	35	0.381	0.2	0.183	FANCA	NM_000135	intron			FANCONI, TLS
rs2664593	17	4491881	35	0.22	0.189	0.117	ALOX15	NM_001140	flanking_5UTR			-
rs7220870	17	4491967	35	0.229	0.194	0.108	ALOX15	NM_001140	flanking_5UTR			-
rs1126667	17	6843484	35	0.466	0.433	0.3	ALOX12	NM_000697	coding	non synonymous	Q261R (NP_000688)	-
rs5435	17	7127847	35	0.449	0.378	0.083	SLC2A4	NM_001042	coding	Synonymous	N130N (NP_001033)	-
rs4227	17	7431901	35	0.203	0.139	0.467	MPDU1	NM_004870	3UTR			-
rs13894	17	7470627	35	0.102	0.056	0.058	SAT2	NM_133491	coding	non synonymous	R126C (NP_597998)	-
rs858520	17	7470996	35	0.381	0.261	0.008	SAT2	NM_133491	coding	Synonymous	P98P (NP_597998)	-
rs6257	17	7474442	35	0.093	0	0.05	SHBG	NM_001040	intron			-
rs858517	17	7474996	35	0.068	0	0	SHBG	NM_001040	intron			-
rs6259	17	7477252	35	0.144	0.189	0	SHBG	NM_001040	coding	non synonymous	D356N (NP_001031)	-
rs727428	17	7478517	35	0.483	0.411	0.458	SHBG	NM_001040	flanking_3UTR			-
rs1641535	17	7486858	35	0.136	0.339	0.367	ATP1B2	NM_001678	flanking_5UTR			-
rs1624085	17	7494468	35	0.458	0.383	0.142	ATP1B2	NM_001678	flanking_5UTR			-
rs1641512	17	7500187	35	0.271	0.406	0.4	ATP1B2	NM_001678	3UTR			-
rs1614984	17	7512177	35	0.441	0.417	0.442	TP53	NM_000546	flanking_3UTR			-
rs12951053	17	7518132	35	0.102	0.361	0.125	TP53	NM_000546	intron			-
rs2909430	17	7519370	35	0.093	0.017	0.267	TP53	NM_000546	intron			-
rs8079544	17	7520777	35	0.068	0.083	0.108	TP53	NM_000546	intron			-
rs2078486	17	7523808	35	0.102	0.267	0.292	TP53	NM_000546	intron			-
rs2287499	17	7532893	35	0.161	0.278	0.083	WDR79	NM_018081	coding	non synonymous	R68G (NP_060551)	-
FLJ10385-09	17	7533207	35	0.076	0.111	0.042	WDR79	NM_018081	intron			-
rs2287498	17	7533285	35	0.102	0.278	0.308	WDR79	NM_018081	coding	Synonymous	F150F (NP_060551)	-
FLJ10385-06	17	7533527	35	0.051	0	0.383	WDR79	NM_018081	intron			-
rs3744263	17	7554433	35	0.424	0.389	0.308	EFNB3	NM_001406	3UTR			-
rs3744262	17	7554490	35	0.475	0.406	0.125	EFNB3	NM_001406	3UTR			-
rs9282801	17	23120600	35	0.322	0.133	0.35	NOS2A	NM_000625	intron			-
rs2297518	17	23120724	35	0.161	0.106	0.075	NOS2A	NM_000625	coding	non synonymous	S569L (NP_695024)	-
rs1052536	17	30355688	35	0.458	0.244	0.067	LIG3	NM_013975	3UTR			NER, BER, MMEJ
rs2280789	17	31231116	35	0.085	0.35	0.208	CCL5	NM_002985	intron			-
rs2107538	17	31231893	35	0.11	0.367	0.408	CCL5	NM_002985	flanking_5UTR			-
rs1810132	17	35119531	35	0.28	0.444	0.492	ERBB2	NM_004448	intron			-
rs1058808	17	35137563	35	0.297	0.433	0.1	ERBB2	NM_004448	coding	non synonymous	P1170A (NP_004439)	-
rs2227338	17	35426468	35	0.068	0.189	0.092	CSF3	NM_172220	intron			-
rs1042658	17	35427428	35	0.424	0.422	0.358	CSF3	NM_172220	3UTR			-
rs9257	17	36338030	35	0.475	0.261	0.4	KRT23	NM_015515	coding	non synonymous	T90A (NP_775320)	-
rs2269858	17	36346394	35	0.305	0.489	0.183	KRT23	NM_015515	5UTR			-
rs597255	17	37958626	35	0.398	0.417	0.392	HSD17B1	NM_000413	intron			-
rs2676530	17	37959481	35	0.263	0.028	0.225	HSD17B1	NM_000413	intron			-
rs676387	17	37959799	35	0.339	0.394	0.142	HSD17B1	NM_000413	intron			-
rs1799966	17	38476620	35	0.356	0.294	0.208	BRCA1	NM_007296	coding	non synonymous	S430G (NP_009229)	HR, FANCONI
rs8176212	17	38480127	35	0.356	0.294	0.2	BRCA1	NM_007296	flanking_5UTR			HR, FANCONI
rs1060915	17	38487996	35	0.356	0.289	0.092	BRCA1	NM_007296	coding	Synonymous	S1436S (NP_009230)	HR, FANCONI
rs4986852	17	38497955	35	0.042	0	0	BRCA1	NM_007297	coding	non synonymous	S1040N (NP_009232)	HR, FANCONI
rs16940	17	38498763	35	0.356	0.294	0.092	BRCA1	NM_007297	coding	Synonymous	L730L (NP_009233)	HR, FANCONI
rs1799949	17	38498992	35	0.356	0.294	0.192	BRCA1	NM_007297	coding	Synonymous	S694S (NP_009226)	HR, FANCONI
rs1799950	17	38500007	35	0.042	0	0	BRCA1	NM_007297	coding	non synonymous	Q315R (NP_009233)	HR, FANCONI
rs799923	17	38505457	35	0.297	0	0	BRCA1	NM_007296	intron			HR, FANCONI
rs4987082	17	44836373	35	0.483	0.183	0	PHB	NM_002634	flanking_3UTR			-
rs2114443	17	51182251	35	0.119	0.117	0.342	PCTP	NM_021213	flanking_5UTR			-
rs12948867	17	51182315	35	0.127	0	0.017	PCTP	NM_021213	flanking_5UTR			-
rs2071409	17	53703229	35	0.085	0.128	0.133	MPO	NM_000250	intron			-
rs4986763	17	57115778	35	0.458	0.2	0.4	BRIP1	NM_032043	coding	Synonymous	Y1137Y (NP_114432)	HR, FANCONI, TLS
rs4986764	17	57118129	35	0.458	0.2	0.367	BRIP1	NM_032043	coding	non synonymous	S919P (NP_114432)	HR, FANCONI, TLS
rs4986765	17	57118247	35	0.407	0.1	0.075	BRIP1	NM_032043	coding	Synonymous	E879E (NP_114432)	HR, FANCONI, TLS
rs1015771	17	57205306	35	0.237	0.211	0.217	BRIP1	NM_032043	intron			HR, FANCONI, TLS
rs4988340	17	57295415	35	0.229	0.289	0.05	BRIP1	NM_032043	intron			HR, FANCONI, TLS
rs2048718	17	57295601	35	0.356	0.172	0.158	BRIP1	NM_032043	flanking_5UTR			HR, FANCONI, TLS
rs11868547	17	60954065	35	0.492	0.361	0.1	AXIN2	NM_004655	flanking_3UTR			-
rs7210356	17	60959412	35	0.127	0.106	0.15	AXIN2	NM_004655	intron			-
rs4128941	17	60961793	35	0.068	0.361	0.117	AXIN2	NM_004655	intron			-
rs4541111	17	60965000	35	0.432	0.294	0.1	AXIN2	NM_004655	intron			-
rs11867417	17	60968360	35	0.288	0.322	0.275	AXIN2	NM_004655	intron			-
rs3923087	17	60979723	35	0.212	0.344	0.058	AXIN2	NM_004655	intron			-
rs2240308	17	60985053	35	0.483	0.322	0.017	AXIN2	NM_004655	coding	non synonymous	P50S (NP_004646)	-
rs9282553	17	64619957	35	0.051	0.117	0.433	ABCA6	NM_080284	coding	non synonymous	M698I (NP_525023)	-
rs9282552	17	64621489	35	0.415	0.244	0.258	ABCA6	NM_080284	intron			-
rs15886	17	64754884	35	0.483	0.361	0.175	ABCA5	NM_018672	3UTR			-
rs1059394	18	662792	35	0.271	0.339	0.425	TYMS	NM_001071	intron			-
rs699517	18	663016	35	0.271	0.339	0.425	TYMS	NM_001071	3UTR			-
rs2790	18	663086	35	0.195	0.411	0.242	TYMS	NM_001071	3UTR			-
rs7614	18	49935242	35	0.415	0.411	0.183	MBD2	NM_003927	3UTR			-
rs1145315	18	49942953	35	0.398	0.4	0.4	MBD2	NM_003927	intron			-
rs609791	18	49973124	35	0.203	0	0	MBD2	NM_003927	flanking_5UTR			-
rs603097	18	50007104	35	0.169	0	0	MBD2	NM_003927	flanking_5UTR			-
rs3764651	19	1002751	35	0.449	0.383	0.308	ABCA7	NM_019112	intron			-
rs3752241	19	1004524	35	0.195	0.172	0.217	ABCA7	NM_019112	coding	Synonymous	L1001L (NP_150651)	-
rs9282559	19	1004575	35	0.093	0	0.4	ABCA7	NM_019112	intron			-
rs757228	19	1052992	35	0.475	0.394	0.342	GPX4	NM_002085	flanking_5UTR			-
rs3746165	19	1053211	35	0.475	0.394	0.342	GPX4	NM_002085	flanking_5UTR			-
rs4807542	19	1055078	35	0.186	0.172	0	GPX4	NM_002085	coding	Synonymous	P12P (NP_002076)	-
rs8178977	19	1057477	35	0.203	0.172	0.3	GPX4	NM_002085	intron			-
rs741764	19	1172484	35	0.237	0.494	0.208	STK11	NM_000455	intron			-
rs3745551	19	7065288	35	0.432	0.261	0.167	INSR	NM_000208	flanking_3UTR			-
rs1051690	19	7067963	35	0.288	0.056	0.267	INSR	NM_000208	3UTR			-
rs1799817	19	7076297	35	0.22	0.356	0.217	INSR	NM_000208	coding	Synonymous	H1085H (NP_000199)	-
rs2860175	19	7083081	35	0.136	0.083	0.283	INSR	NM_000208	intron			-
rs8110533	19	7089828	35	0.042	0.422	0.15	INSR	NM_000208	intron			-
rs3815901	19	7117541	35	0.5	0.289	0.267	INSR	NM_000208	intron			-
rs891087	19	7135518	35	0.085	0.067	0.258	INSR	NM_000208	coding	Synonymous	D261D (NP_000199)	-
rs1035942	19	7150803	35	0.271	0.283	0.15	INSR	NM_000208	intron			-
rs1035940	19	7150978	35	0.271	0.283	0.15	INSR	NM_000208	intron			-
rs3745545	19	7162841	35	0.22	0.067	0.142	INSR	NM_000208	intron			-
INSR-59	19	7163570	35	0.051	0	0	INSR	NM_000208	intron			-
rs919275	19	7212441	35	0.432	0.244	0.125	INSR	NM_000208	intron			-
rs2233678	19	9806179	35	0.136	0.039	0.392	PIN1	NM_006221	flanking_5UTR			-
rs2233679	19	9806354	35	0.339	0.422	0.417	PIN1	NM_006221	flanking_5UTR			-
rs889162	19	9812916	35	0.186	0.217	0.083	PIN1	NM_006221	intron			-
rs1985604	19	9813743	35	0.11	0.05	0.033	PIN1	NM_006221	intron			-
rs2010457	19	9819878	35	0.322	0.261	0.417	PIN1	NM_006221	intron			-
rs5030390	19	10243537	35	0.11	0	0	ICAM1	NM_000201	intron			-
rs281432	19	10251658	35	0.483	0.317	0.358	ICAM1	NM_000201	intron			-
rs5498	19	10256683	35	0.398	0.35	0.175	ICAM1	NM_000201	coding	non synonymous	K469E (NP_000192)	-
rs3093032	19	10257336	35	0.169	0.044	0	ICAM1	NM_000201	3UTR			-
rs1003723	19	11085181	35	0.458	0.161	0	LDLR	NM_000527	intron			-
rs5930	19	11085265	35	0.441	0.406	0.242	LDLR	NM_000527	coding	Synonymous	R471R (NP_000518)	-
rs5925	19	11091881	35	0.458	0.206	0.108	LDLR	NM_000527	coding	Synonymous	V653V (NP_000518)	-
rs14158	19	11103044	35	0.212	0.433	0.175	LDLR	NM_000527	3UTR			-
rs3008	19	17798429	35	0.432	0.456	0.35	JAK3	NM_000215	3UTR			-
rs3212752	19	17809732	35	0.093	0.022	0.258	JAK3	NM_000215	intron			-
rs3212711	19	17816021	35	0.263	0.306	0.45	JAK3	NM_000215	intron			-
rs1059519	19	18358024	35	0.381	0.311	0.175	GDF15	NM_004864	coding	non synonymous	V9L (NP_004855)	-
rs1059369	19	18358141	35	0.161	0.428	0.15	GDF15	NM_004864	coding	non synonymous	S48T (NP_004855)	-
rs2241719	19	46521421	35	0.127	0.233	0.067	MGC20255	NM_052848	3UTR			-
rs1800471	19	46550716	35	0.102	0	0.05	TGFB1	NM_000660	coding	non synonymous	P25R	-
rs1800469	19	46552136	35	0.314	0.5	0.217	TGFB1	NM_000660	flanking_5UTR			-
rs25487	19	48747566	35	0.39	0.256	0.1	XRCC1	NM_006297	coding	non synonymous	Q399R (NP_006288)	NER, BER, MMEJ
rs25486	19	48747738	35	0.39	0.278	0.175	XRCC1	NM_006297	intron			NER, BER, MMEJ
rs12753	19	49207354	35	0.169	0.211	0.283	ZNF230	NM_006300	coding	non synonymous	D441E	-
rs440446	19	50101007	35	0.373	0.4	0.125	APOE	NM_000041	intron			-
rs13181	19	50546759	35	0.322	0.078	0.183	ERCC2	NM_000400	coding	non synonymous	K751Q (NP_000391)	NER
rs1799787	19	50547984	35	0.28	0.078	0.058	ERCC2	NM_000400	intron			NER
rs6966	19	50574802	35	0.144	0.483	0.217	PPP1R13L	NM_006663	3UTR			-
rs3212986	19	50604576	35	0.22	0.239	0.325	CD3EAP	NM_012099	coding	non synonymous	Q504K (NP_036231)	-
rs11615	19	50615493	35	0.347	0.256	0.017	ERCC1	NM_001983	coding	Synonymous	N118N (NP_973730)	NER, SSA, MMEJ, FANCONI
rs3212948	19	50616202	35	0.305	0.256	0.025	ERCC1	NM_001983	intron			NER, SSA, MMEJ, FANCONI
rs13436	19	53312848	35	0.415	0.217	0.408	LIG1	NM_000234	coding	Synonymous	A814A (NP_000225)	NER, BER, MMR
rs3729512	19	53314187	35	0.136	0.061	0.292	LIG1	NM_000234	intron			NER, BER, MMR
rs156641	19	53323220	35	0.331	0.461	0.042	LIG1	NM_000234	intron			NER, BER, MMR
rs20580	19	53346365	35	0.466	0.394	0.475	LIG1	NM_000234	coding	Synonymous	A170A (NP_000225)	NER, BER, MMR
rs20579	19	53360642	35	0.119	0.072	0.325	LIG1	NM_000234	5UTR			NER, BER, MMR
rs603985	19	53899069	35	0.398	0.011	0.458	FUT2	NM_000511	3UTR			-
rs4987162	19	54130245	35	0.212	0.45	0.233	DHDH	NM_014475	intron			-
rs2270939	19	54134745	35	0.153	0.428	0.333	DHDH	NM_014475	coding	Synonymous	S198S (NP_055290)	-
rs4645887	19	54151688	35	0.398	0.278	0.2	BAX	NM_004324	flanking_3UTR			-
rs905238	19	54157196	35	0.483	0.311	0.408	BAX	NM_138765	flanking_3UTR			-
rs7251	19	54854721	35	0.364	0.356	0.267	IRF3	NM_001571	coding	non synonymous	S427T (NP_001562)	-
rs2304206	19	54860683	35	0.28	0.172	0.258	IRF3	NM_001571	intron			-
rs2304204	19	54860832	35	0.28	0.256	0.208	IRF3	NM_001571	5UTR			-
rs1726787	19	55594143	35	0.051	0.206	0.35	POLD1	NM_002691	intron			NER, BER, MMR, MMEJ
rs2278414	19	57159634	35	0.136	0.217	0.017	ZNF350	NM_021632	3UTR			-
rs2278415	19	57160015	35	0.136	0.217	0.092	ZNF350	NM_021632	coding	non synonymous	R501S (NP_067645)	-
rs4988334	19	57160810	35	0.136	0.217	0.317	ZNF350	NM_021632	coding	Synonymous	C236C (NP_067645)	-
rs1042034	2	21136933	35	0.195	0.317	0.167	APOB	NM_000384	coding	non synonymous	S4338N (NP_000375)	-
rs3791981	2	21157019	35	0.102	0.056	0.5	APOB	NM_000384	intron			-
rs1469513	2	21171214	35	0.407	0.083	0.175	APOB	NM_000384	intron			-
rs1367117	2	21175552	35	0.271	0.1	0.033	APOB	NM_000384	coding	non synonymous	T98I (NP_000375)	-
rs1800481	2	21178862	35	0.212	0	0.35	APOB	NM_000384	flanking_5UTR			-
rs2303287	2	24213897	35	0.229	0.117	0	TP53I3	NM_004881	flanking_3UTR			-
rs4149372	2	24217163	35	0.373	0.161	0.125	TP53I3	NM_004881	intron			-
rs4149371	2	24219426	35	0.085	0.072	0	TP53I3	NM_147184	flanking_5UTR			-
rs10170774	2	24219779	35	0.144	0.044	0.025	TP53I3	NM_147184	flanking_5UTR			-
rs7603220	2	24221351	35	0.144	0.044	0.05	TP53I3	NM_147184	flanking_5UTR			-
rs1049987	2	26325468	35	0.229	0.122	0.008	HADHA	NM_000182	3UTR			-
rs7260	2	26325568	35	0.229	0.133	0.317	HADHA	NM_000182	3UTR			-
rs2289019	2	26332460	35	0.229	0.133	0.008	HADHA	NM_000182	intron			-
rs163077	2	38197256	35	0.297	0.228	0.025	FAM82A	NM_144713	intron			-
rs1367696	2	38198565	35	0.398	0.094	0.258	FAM82A	NM_144713	intron			-
rs163086	2	38204413	35	0.203	0.022	0.142	FAM82A	NM_144713	intron			-
rs162549	2	38207107	35	0.203	0.022	0.133	CYP1B1	NM_000104	3UTR			-
rs10916	2	38208821	35	0.229	0.083	0.367	CYP1B1	NM_000104	3UTR			-
rs162562	2	38209166	35	0.229	0.083	0.25	CYP1B1	NM_000104	3UTR			-
rs1800440	2	38209790	35	0.178	0.006	0	CYP1B1	NM_000104	coding	non synonymous	N453S (NP_000095)	-
rs162556	2	38218105	35	0.466	0.161	0.033	CYP1B1	NM_000104	flanking_5UTR			-
rs162555	2	38219160	35	0.195	0.022	0.125	CYP1B1	NM_000104	flanking_5UTR			-
rs10175368	2	38219512	35	0.288	0.128	0.05	CYP1B1	NM_000104	flanking_5UTR			-
rs9282575	2	43991257	35	0.059	0	0.058	ABCG8	NM_022437	coding	Synonymous	V225V (NP_071882)	-
rs9282572	2	43991322	35	0.059	0	0.067	ABCG8	NM_022437	intron			-
rs6544718	2	44016576	35	0.212	0	0	ABCG8	NM_022437	coding	non synonymous	V632A (NP_071882)	-
rs1863332	2	47541549	35	0.059	0.189	0.183	MSH2	NM_000251	flanking_5UTR			BER, MMR, SSA
rs4952887	2	47558619	35	0.119	0.2	0.142	MSH2	NM_000251	intron			BER, MMR, SSA
rs17036577	2	47578489	35	0.059	0.017	0.075	MSH2	NM_000251	intron			BER, MMR, SSA
rs7607076	2	47583216	35	0.331	0.394	0.383	MSH2	NM_000251	intron			BER, MMR, SSA
rs1981928	2	47584126	35	0.331	0.394	0.392	MSH2	NM_000251	intron			BER, MMR, SSA
rs7602094	2	47585166	35	0.331	0.394	0.35	MSH2	NM_000251	intron			BER, MMR, SSA
rs7585925	2	47585935	35	0.11	0.461	0	MSH2	NM_000251	intron			BER, MMR, SSA
rs3771281	2	47603932	35	0.441	0.378	0.3	MSH2	NM_000251	intron			BER, MMR, SSA
rs17036614	2	47610353	35	0.11	0.467	0	MSH2	NM_000251	intron			BER, MMR, SSA
rs3821227	2	47612608	35	0.441	0.389	0.308	MSH2	NM_000251	intron			BER, MMR, SSA
rs2303428	2	47615151	35	0.11	0.294	0	MSH2	NM_000251	intron			BER, MMR, SSA
rs4608577	2	47615635	35	0.22	0.144	0.217	MSH2	NM_000251	intron			BER, MMR, SSA
rs2042649	2	47621355	35	0.11	0.472	0	MSH2	NM_000251	intron			BER, MMR, SSA
rs6544991	2	47624431	35	0.22	0.344	0.242	MSH2	NM_000251	flanking_3UTR			BER, MMR, SSA
rs3136228	2	47921467	35	0.39	0	0.217	MSH6	NM_000179	flanking_5UTR			BER, MMR
rs1800935	2	47934766	35	0.339	0	0.158	MSH6	NM_000179	coding	Synonymous	D180D (NP_000170)	BER, MMR
rs1667627	2	74340847	35	0.492	0.339	0.133	MTHFD2	NM_006636	intron			-
rs17561	2	113253454	35	0.305	0.106	0.133	IL1A	NM_000575	coding	non synonymous	A114S (NP_000566)	-
rs2071374	2	113253583	35	0.297	0.233	0.317	IL1A	NM_000575	intron			-
rs1071676	2	113303664	35	0.246	0.05	0.1	IL1B	NM_000576	3UTR			-
rs1143634	2	113306621	35	0.246	0.05	0.1	IL1B	NM_000576	coding	Synonymous	F105F (NP_000567)	-
rs3136558	2	113307506	35	0.22	0.378	0.15	IL1B	NM_000576	intron			-
rs1143627	2	113310618	35	0.373	0.456	0.358	IL1B	NM_000576	flanking_5UTR			-
rs16944	2	113311098	35	0.364	0.456	0.4	IL1B	NM_000576	flanking_5UTR			-
rs419598	2	113603438	35	0.28	0.039	0.017	IL1RN	NM_000577	coding	Synonymous	A57A (NP_776214)	-
rs454078	2	113605024	35	0.28	0.039	0.017	IL1RN	NM_000577	intron			-
rs380092	2	113605131	35	0.305	0.389	0.167	IL1RN	NM_000577	intron			-
rs4150474	2	127749557	35	0.237	0.006	0.408	ERCC3	NM_000122	intron			NER
rs4150416	2	127762778	35	0.288	0.006	0.458	ERCC3	NM_000122	intron			NER
rs853785	2	169628101	35	0.449	0.433	0.317	ABCB11	NM_003742	intron			-
rs3770603	2	169708725	35	0.076	0.167	0.1	ABCB11	NM_003742	intron			-
rs5742926	2	190474311	35	0.169	0.083	0.017	PMS1	NM_000534	flanking_5UTR			MMR
rs5742938	2	190475464	35	0.254	0.261	0.133	PMS1	NM_000534	intron			MMR
rs1233299	2	190490144	35	0.254	0.261	0.117	PMS1	NM_000534	intron			MMR
rs1233302	2	190494386	35	0.254	0.261	0.025	PMS1	NM_000534	intron			MMR
rs5743030	2	190504051	35	0.051	0.117	0.242	PMS1	NM_000534	intron			MMR
rs1233284	2	190515277	35	0.254	0.261	0.442	PMS1	NM_000534	intron			MMR
rs1233288	2	190516231	35	0.254	0.261	0.45	PMS1	NM_000534	intron			MMR
rs1233291	2	190516457	35	0.271	0.261	0	PMS1	NM_000534	intron			MMR
rs1233297	2	190519681	35	0.254	0.267	0.025	PMS1	NM_000534	intron			MMR
rs1233255	2	190531598	35	0.178	0.128	0.4	PMS1	NM_000534	intron			MMR
rs1233258	2	190532540	35	0.288	0.378	0.167	PMS1	NM_000534	intron			MMR
rs12618262	2	190533579	35	0.068	0.178	0.175	PMS1	NM_000534	intron			MMR
rs5743112	2	190534488	35	0.068	0.194	0.225	PMS1	NM_000534	intron			MMR
rs5743116	2	190539474	35	0.068	0.194	0.125	PMS1	NM_000534	intron			MMR
rs256567	2	190553037	35	0.085	0.228	0.167	PMS1	NM_000534	intron			MMR
rs256564	2	190555555	35	0.085	0.228	0.133	PMS1	NM_000534	intron			MMR
rs256563	2	190557338	35	0.085	0.228	0.167	PMS1	NM_000534	intron			MMR
rs256552	2	190567880	35	0.085	0.228	0.125	PMS1	NM_000534	flanking_3UTR			MMR
rs256550	2	190570244	35	0.085	0.233	0.133	PMS1	NM_000534	flanking_3UTR			MMR
rs2066804	2	191667265	35	0.237	0.45	0.133	STAT1	NM_007315	intron			-
rs3900115	2	201876183	35	0.466	0.172	0.483	CASP10	NM_001230	coding	Synonymous	S59S (NP_116756)	-
rs2349070	2	201955814	35	0.356	0.289	0.183	CASP8	NM_001228	flanking_5UTR			-
rs2293554	2	201957093	35	0.051	0.272	0.492	CASP8	NM_001228	intron			-
rs1035142	2	201978584	35	0.475	0.294	0.367	ALS2CR12	NM_139163	3UTR			-
rs1207955	2	202722555	35	0.237	0.106	0.392	FZD7	NM_003507	flanking_5UTR			-
rs13034206	2	202726741	35	0.322	0.006	0.25	FZD7	NM_003507	3UTR			-
rs4673222	2	202727416	35	0.085	0.306	0.1	FZD7	NM_003507	3UTR			-
rs12474408	2	202729312	35	0.322	0.006	0.25	FZD7	NM_003507	flanking_3UTR			-
rs11571315	2	204556407	35	0.373	0.339	0.483	CTLA4	NM_005214	flanking_5UTR			-
rs4553808	2	204556511	35	0.161	0.089	0.175	CTLA4	NM_005214	flanking_5UTR			-
rs11571316	2	204556595	35	0.466	0.25	0.192	CTLA4	NM_005214	flanking_5UTR			-
rs11571317	2	204557514	35	0.093	0	0	CTLA4	NM_005214	flanking_5UTR			-
rs5742909	2	204557853	35	0.085	0.089	0	CTLA4	NM_005214	flanking_5UTR			-
rs231775	2	204558220	35	0.373	0.339	0.3	CTLA4	NM_005214	coding	non synonymous	T17A (NP_005205)	-
rs3087243	2	204564425	35	0.466	0.25	0.192	CTLA4	NM_005214	flanking_3UTR			-
rs5031011	2	215457698	35	0.381	0.322	0.325	BARD1	NM_000465	intron			HR
rs2229571	2	215470970	35	0.424	0.328	0.383	BARD1	NM_000465	coding	non synonymous	R378S (NP_000456)	HR
rs2070096	2	215471051	35	0.288	0.161	0.208	BARD1	NM_000465	coding	Synonymous	T351T (NP_000456)	HR
rs828910	2	216802534	35	0.458	0.189	0.483	XRCC5	NM_021141	intron			NHEJ
rs828702	2	216818984	35	0.441	0.194	0.433	XRCC5	NM_021141	intron			NHEJ
rs207916	2	216853066	35	0.398	0.256	0.208	XRCC5	NM_021141	intron			NHEJ
rs1051685	2	216895882	35	0.11	0.072	0.35	XRCC5	NM_021141	3UTR			NHEJ
rs2440	2	216896272	35	0.373	0.267	0.158	XRCC5	NM_021141	3UTR			NHEJ
rs1106037	2	217310196	35	0.322	0.472	0.225	IGFBP2	NM_000597	flanking_5UTR			-
rs2372848	2	217329618	35	0.169	0.011	0.35	IGFBP2	NM_000597	intron			-
rs2270360	2	217350492	35	0.288	0.5	0.008	IGFBP2	NM_000597	intron			-
rs2241193	2	217379719	35	0.11	0.2	0.225	IGFBP5	NM_000599	intron			-
rs1978346	2	217386973	35	0.364	0.489	0.217	IGFBP5	NM_000599	flanking_5UTR			-
rs1126579	2	218826240	35	0.483	0.322	0.058	IL8RB	NM_001557	3UTR			-
rs2854386	2	218853008	35	0.059	0.111	0.425	IL8RA	NM_000634	flanking_3UTR			-
rs1366757	2	227472865	35	0.042	0.278	0.242	IRS1	NM_005544	intron			-
rs9282766	2	227480853	35	0.076	0	0	IRS1	NM_005544	intron			-
rs1801278	2	227486049	35	0.059	0.05	0.1	IRS1	NM_005544	coding	non synonymous	G971R (NP_005535)	-
rs1042640	2	234463544	35	0.203	0.156	0.2	UGT1A8	NM_019076	3UTR			-
rs7568	2	242011733	35	0.186	0.461	0.042	2002-09-01	NM_001008491	3UTR			-
rs910656	20	3735496	35	0.415	0.456	0.125	CDC25B	NM_212530	flanking_3UTR			-
rs1110277	20	4802682	35	0.263	0.289	0.242	SLC23A2	NM_005116	coding	Synonymous	D334D (NP_005107)	-
rs4987219	20	4812946	35	0.297	0.289	0.083	SLC23A2	NM_005116	intron			-
rs1776964	20	4828308	35	0.441	0.35	0.367	SLC23A2	NM_005116	coding	Synonymous	A125A (NP_976072)	-
rs1715364	20	4846896	35	0.373	0.322	0.15	SLC23A2	NM_005116	intron			-
rs1715365	20	4847088	35	0.356	0.322	0.483	SLC23A2	NM_005116	intron			-
rs4813725	20	4865985	35	0.314	0.339	0	SLC23A2	NM_005116	intron			-
rs6084957	20	4928505	35	0.347	0.294	0.075	SLC23A2	NM_005116	intron			-
rs12479919	20	4928740	35	0.347	0.294	0.092	SLC23A2	NM_005116	intron			-
rs17352	20	5045976	35	0.119	0	0.4	PCNA	NM_182649	intron			NER, BER, MMR, TLS
rs17349	20	5047516	35	0.119	0	0.3	PCNA	NM_182649	flanking_5UTR			NER, BER, MMR, TLS
rs25406	20	5047636	35	0.398	0.35	0.458	PCNA	NM_182649	flanking_5UTR			NER, BER, MMR, TLS
rs1994251	20	29750989	35	0.22	0	0.4	BCL2L1	NM_138578	flanking_3UTR			-
rs1484994	20	29769636	35	0.314	0	0.3	BCL2L1	NM_138578	flanking_3UTR			-
rs3181073	20	29770860	35	0.22	0	0.408	BCL2L1	NM_138578	flanking_3UTR			-
rs1131847	20	36399031	35	0.364	0.489	0.233	BPI	NM_001725	3UTR			-
rs385345	20	41725375	35	0.186	0.256	0.267	MYBL2	NM_002466	flanking_5UTR			-
rs619289	20	41728027	35	0.068	0.261	0.292	MYBL2	NM_002466	flanking_5UTR			-
rs826950	20	41735785	35	0.051	0.256	0.292	MYBL2	NM_002466	intron			-
rs419842	20	41744225	35	0.076	0.261	0.35	MYBL2	NM_002466	intron			-
rs285164	20	41762190	35	0.322	0.294	0.192	MYBL2	NM_002466	intron			-
rs420755	20	41770098	35	0.076	0.267	0.417	MYBL2	NM_002466	intron			-
rs285171	20	41771289	35	0.076	0.267	0.417	MYBL2	NM_002466	intron			-
rs1535045	20	44181506	35	0.237	0.339	0.025	CD40	NM_001250	intron			-
rs3765459	20	44190814	35	0.237	0.333	0.025	CD40	NM_001250	intron			-
rs2076546	20	45701900	35	0.11	0.128	0.192	NCOA3	NM_006534	coding	Synonymous	T960T (NP_006525)	-
rs396221	20	45707496	35	0.458	0.306	0.425	NCOA3	NM_006534	intron			-
rs427967	20	45707592	35	0.22	0.167	0.183	NCOA3	NM_006534	intron			-
rs751087	20	52210324	35	0.161	0.394	0.467	CYP24A1	NM_000782	intron			-
rs2296241	20	52219626	35	0.5	0.439	0.433	CYP24A1	NM_000782	coding	Synonymous	A184A	-
rs2245153	20	52219813	35	0.178	0.189	0.308	CYP24A1	NM_000782	intron			-
rs2259735	20	52221721	35	0.415	0.322	0.192	CYP24A1	NM_000782	intron			-
rs2248359	20	52224925	35	0.381	0.383	0.283	CYP24A1	NM_000782	flanking_5UTR			-
rs8173	20	54378198	35	0.237	0.356	0.233	STK6	NM_003600	3UTR			-
STK6-08	20	54378420	35	0.127	0	0.075	STK6	NM_003600	3UTR			-
rs10485805	20	54379190	35	0.195	0.239	0.05	STK6	NM_003600	intron			-
rs6024840	20	54390114	35	0.212	0.339	0.392	STK6	NM_003600	intron			-
rs2298016	20	54392703	35	0.178	0.367	0.25	STK6	NM_003600	intron			-
rs1047972	20	54394870	35	0.186	0.139	0.133	STK6	NM_003600	coding	non synonymous	I57V (NP_940835)	-
rs2273535	20	54394948	35	0.178	0.367	0.167	STK6	NM_003600	coding	non synonymous	F31I (NP_940835)	-
rs732417	20	54400472	35	0.085	0	0.125	STK6	NM_003600	5UTR			-
rs16979877	20	54401445	35	0.085	0	0.042	CSTF1	NM_001033522	flanking_3UTR			-
rs6064387	20	54401566	35	0.458	0.15	0.475	CSTF1	NM_001033522	flanking_3UTR			-
rs6099129	20	54402046	35	0.085	0	0.158	CSTF1	NM_001033522	flanking_3UTR			-
rs6064389	20	54402142	35	0.458	0.15	0.283	CSTF1	NM_001033522	flanking_3UTR			-
BIC-21	21	25857384	35	0.068	0.017	0.242	MRPL39	NM_017446	flanking_3UTR			-
rs4143370	21	25858844	35	0.042	0.172	0.008	MRPL39	NM_017446	flanking_3UTR			-
rs12482371	21	25860224	35	0.085	0.283	0.283	MRPL39	NM_017446	flanking_3UTR			-
rs915860	21	25860356	35	0.068	0.017	0.242	MRPL39	NM_017446	flanking_3UTR			-
rs4817027	21	25860860	35	0.22	0.128	0.392	MRPL39	NM_017446	flanking_3UTR			-
rs1893650	21	25862686	35	0.212	0.128	0.417	MRPL39	NM_017446	flanking_3UTR			-
rs928883	21	25865896	35	0.11	0.433	0.283	MRPL39	NM_017446	flanking_3UTR			-
rs2829801	21	25866176	35	0.212	0.128	0.475	MRPL39	NM_017446	flanking_3UTR			-
rs767649	21	25866593	35	0.042	0.417	0.042	MRPL39	NM_017446	flanking_3UTR			-
rs2829803	21	25870181	35	0.212	0.133	0.4	MRPL39	NM_017446	flanking_3UTR			-
rs2070424	21	31961191	35	0.093	0.456	0.192	SOD1	NM_000454	intron			-
rs3153	21	33531375	35	0.356	0.422	0.075	IFNAR2	NM_000874	intron			-
rs7279064	21	33536125	35	0.39	0.422	0.108	IFNAR2	NM_000874	coding	non synonymous	F10V (NP_997468)	-
rs2236757	21	33546787	35	0.347	0.422	0.142	IFNAR2	NM_000874	intron			-
rs1059293	21	33731563	35	0.483	0.189	0.133	IFNGR2	NM_005534	3UTR			-
rs25678	21	36364502	35	0.119	0.272	0.058	CBR1	NM_001757	coding	Synonymous	L73L (NP_001748)	-
rs1005695	21	36365435	35	0.407	0.244	0.258	CBR1	NM_001757	intron			-
rs2156406	21	36365541	35	0.119	0.261	0	CBR1	NM_001757	intron			-
rs881712	21	36429639	35	0.441	0.5	0.042	CBR3	NM_001236	coding	Synonymous	V93V (NP_001227)	-
rs458582	21	41726376	35	0.441	0	0.042	MX1	NM_002462	intron			-
rs455599	21	41726549	35	0.441	0	0.042	MX1	NM_002462	intron			-
rs469270	21	41739047	35	0.339	0.078	0.425	MX1	NM_002462	intron			-
rs469390	21	41739800	35	0.314	0.189	0.442	MX1	NM_002462	coding	non synonymous	V379I (NP_002453)	-
rs2070229	21	41742983	35	0.237	0.294	0.392	MX1	NM_002462	coding	Synonymous	R441R (NP_002453)	-
rs2280807	21	41743135	35	0.102	0.328	0.142	MX1	NM_002462	intron			-
rs2072683	21	41746319	35	0.102	0.25	0.067	MX1	NM_002462	intron			-
rs1050008	21	41746531	35	0.102	0.5	0.183	MX1	NM_002462	coding	Synonymous	A541A (NP_002453)	-
rs469304	21	41746603	35	0.39	0	0.183	MX1	NM_002462	coding	Synonymous	Q565Q (NP_002453)	-
rs2236705	21	42605897	35	0.119	0.156	0.008	TFF3	NM_003226	intron			-
rs2839488	21	42659255	35	0.356	0.339	0.275	TFF1	NM_003225	intron			-
rs12613	21	43346760	35	0.085	0	0.158	CBS	NM_000071	3UTR			-
rs6586282	21	43351566	35	0.169	0	0.242	CBS	NM_000071	intron			-
rs234706	21	43358419	35	0.347	0.028	0.25	CBS	NM_000071	coding	Synonymous	Y233Y (NP_000062)	-
rs397589	21	43363283	35	0.458	0.128	0.467	CBS	NM_000071	intron			-
rs2236451	21	45700511	35	0.314	0.317	0.408	COL18A1	NM_030582	coding	Synonymous	P213P	-
rs2236467	21	45724838	35	0.042	0.133	0.283	COL18A1	NM_130445	coding	Synonymous	F476F	-
rs7499	21	45756756	35	0.407	0.417	0.475	COL18A1	NM_130445	3UTR			-
rs1051298	21	45759254	35	0.424	0.456	0.425	SLC19A1	NM_003056	3UTR			-
rs1051266	21	45782222	35	0.449	0.472	0.258	SLC19A1	NM_194255	coding	non synonymous	H27R (NP_919231)	-
rs6518591	22	18298575	35	0.161	0.094	0.375	TXNRD2	NM_145747	flanking_3UTR			-
rs9306230	22	18302576	35	0.322	0.333	0.05	TXNRD2	NM_006440	flanking_3UTR			-
rs4646310	22	18303360	35	0.161	0.039	0.033	TXNRD2	NM_006440	flanking_3UTR			-
rs7290221	22	18317234	35	0.492	0.467	0.467	COMT	NM_000754	intron			-
rs4646312	22	18322891	35	0.415	0.411	0.133	COMT	NM_000754	intron			-
rs6269	22	18324506	35	0.415	0.411	0.417	COMT	NM_000754	intron			-
rs4680	22	18325825	35	0.492	0.244	0.292	COMT	NM_000754	coding	non synonymous	V108M (NP_009294)	-
rs2240716	22	18344250	35	0.246	0.206	0.1	ARVCF	NM_001670	intron			-
rs12233352	22	21940355	35	0.051	0.078	0.025	BCR	NM_021574	intron			-
rs140504	22	21951923	35	0.119	0.5	0.025	BCR	NM_021574	coding	non synonymous	N796S (NP_067585)	-
rs2267131	22	27515025	35	0.169	0.194	0	XBP1	NM_005080	flanking_3UTR			-
rs2097461	22	27516433	35	0.288	0.356	0.375	XBP1	NM_005080	intron			-
rs2239815	22	27517224	35	0.297	0.356	0.2	XBP1	NM_005080	intron			-
rs3788409	22	27522705	35	0.288	0.356	0.367	XBP1	NM_005080	flanking_5UTR			-
rs757660	22	29117691	35	0.28	0.433	0.433	SEC14L2	NM_012429	coding	non synonymous	R11K (NP_036561)	-
rs1010324	22	29120443	35	0.11	0.361	0	SEC14L2	NM_012429	intron			-
rs2267154	22	29129416	35	0.11	0.361	0.267	SEC14L2	NM_012429	intron			-
rs2267155	22	29134941	35	0.11	0.361	0.067	SEC14L2	NM_012429	intron			-
rs229569	22	35927551	35	0.195	0.367	0.475	SSTR3	NM_001051	coding	Synonymous	A264A (NP_001042)	-
rs86582	22	35927890	35	0.186	0.367	0.475	SSTR3	NM_001051	coding	Synonymous	S151S (NP_001042)	-
rs2016755	22	36864104	35	0.483	0.25	0.3	PLA2G6	NM_001004426	intron			-
rs84473	22	36881826	35	0.492	0.328	0.292	PLA2G6	NM_001004426	intron			-
rs4376	22	36885245	35	0.11	0.128	0.092	PLA2G6	NM_001004426	intron			-
rs132987	22	36888072	35	0.11	0.128	0.208	PLA2G6	NM_001004426	intron			-
rs11704525	22	37953829	35	0.458	0.061	0.15	PDGFB	NM_033016	intron			-
rs3937387	22	41879692	35	0.381	0.011	0.45	BZRP	NM_000714	intron			-
rs113515	22	41881420	35	0.381	0.006	0.483	BZRP	NM_000714	intron			-
rs6971	22	41883424	35	0.347	0.011	0.117	BZRP	NM_000714	coding	non synonymous	H53R (NP_009295)	-
rs125701	3	9765478	35	0.136	0.028	0.025	OGG1	NM_002542	flanking_5UTR			BER
rs2304277	3	9776080	35	0.195	0.494	0.358	OGG1	NM_002542	flanking_3UTR			BER
rs1801282	3	12368125	35	0.076	0.039	0	PPARG	NM_015869	coding	non synonymous	P12A (NP_056953)	-
rs2938392	3	12409608	35	0.475	0.372	0.108	PPARG	NM_005037	intron			-
rs1175541	3	12440488	35	0.331	0.378	0.05	PPARG	NM_005037	intron			-
rs2228001	3	14162450	35	0.398	0.361	0.258	XPC	NM_004628	coding	non synonymous	K939Q	NER, BER
rs3731151	3	14168890	35	0.229	0.039	0.325	XPC	NM_004628	coding	Synonymous	G689G	NER, BER
rs2228000	3	14174889	35	0.297	0.378	0.058	XPC	NM_004628	coding	non synonymous	A499V	NER, BER
rs1799977	3	37028572	35	0.339	0.061	0.042	MLH1	NM_000249	coding	non synonymous	I219V (NP_000240)	BER, MMR
rs2286940	3	37045110	35	0.483	0.133	0.233	MLH1	NM_000249	intron			BER, MMR
rs3732378	3	39282166	35	0.153	0.022	0	CX3CR1	NM_001337	coding	non synonymous	T280M (NP_001328)	-
rs3732379	3	39282260	35	0.212	0.022	0.083	CX3CR1	NM_001337	coding	non synonymous	V249I (NP_001328)	-
rs3864004	3	41215181	35	0.483	0.206	0.258	CTNNB1	NM_001904	flanking_5UTR			-
rs11564437	3	41216997	35	0.042	0	0	CTNNB1	NM_001904	intron			-
rs4533622	3	41217342	35	0.483	0.206	0.267	CTNNB1	NM_001904	intron			-
rs2371452	3	41217867	35	0.483	0.206	0.283	CTNNB1	NM_001904	intron			-
rs9813198	3	41233052	35	0.458	0.206	0.317	CTNNB1	NM_001904	intron			-
rs5743395	3	41244156	35	0.483	0.206	0.267	CTNNB1	NM_001904	intron			-
rs1880481	3	41247085	35	0.483	0.206	0.267	CTNNB1	NM_001904	intron			-
rs11564452	3	41249274	35	0.483	0.256	0.242	CTNNB1	NM_001904	intron			-
rs11564465	3	41252044	35	0.492	0.178	0.033	CTNNB1	NM_001904	intron			-
rs4135385	3	41254444	35	0.288	0.478	0	CTNNB1	NM_001904	intron			-
rs2953	3	41256392	35	0.483	0.256	0.308	CTNNB1	NM_001904	3UTR			-
rs11129895	3	41258386	35	0.492	0.178	0.033	CTNNB1	NM_001904	flanking_3UTR			-
rs9883073	3	41259540	35	0.483	0.206	0.183	CTNNB1	NM_001904	flanking_3UTR			-
rs4987053	3	46281704	35	0.068	0.05	0.1	CCR3	NM_001837	coding	Synonymous	Y17Y (NP_001828)	-
rs3091312	3	46283476	35	0.322	0.444	0.175	CCR3	NM_001837	flanking_3UTR			-
rs1799864	3	46374212	35	0.11	0.25	0.175	CCR2	NM_000647	coding	non synonymous	V64I (NP_000639)	-
rs1799865	3	46374802	35	0.331	0.322	0.292	CCR2	NM_000647	coding	Synonymous	N260N (NP_000638)	-
rs3138042	3	46376036	35	0.331	0.322	0.292	CCR2	NM_000648	flanking_3UTR			-
rs2734648	3	46386844	35	0.415	0.494	0.408	CCR5	NM_000579	intron			-
rs1799987	3	46386939	35	0.492	0.472	0.358	CCR5	NM_000579	intron			-
rs1800024	3	46387563	35	0.119	0.283	0.208	CCR5	NM_000579	intron			-
rs936426	3	48190257	35	0.305	0.15	0.217	CDC25A	NM_001789	intron			-
rs1800668	3	49370761	35	0.237	0.094	0.225	GPX1	NM_000581	5UTR			-
rs3448	3	49371755	35	0.297	0	0.225	RHOA	NM_001664	3UTR			-
rs6784820	3	49425868	35	0.458	0.106	0.333	TCTA	NM_022171	intron			-
rs6997	3	49428838	35	0.237	0.094	0.275	TCTA	NM_022171	3UTR			-
rs8897	3	49435411	35	0.297	0	0.225	NICN1	NM_032316	3UTR			-
rs2228017	3	120746370	35	0.229	0.278	0.15	CD80	NM_005191	coding	Synonymous	V45V (NP_005182)	-
rs9282638	3	120746460	35	0.22	0	0.208	CD80	NM_005191	intron			-
rs1385520	3	120758315	35	0.186	0.267	0.042	CD80	NM_005191	intron			-
rs3732361	3	121024987	35	0.297	0.461	0.133	GSK3B	NM_002093	flanking_3UTR			-
rs2873950	3	121029752	35	0.059	0.483	0.383	GSK3B	NM_002093	intron			-
rs10934500	3	121050813	35	0.059	0.489	0.367	GSK3B	NM_002093	intron			-
rs4624596	3	121054231	35	0.059	0.494	0.358	GSK3B	NM_002093	intron			-
rs1719889	3	121061478	35	0.237	0.05	0.383	GSK3B	NM_002093	intron			-
rs1719888	3	121061570	35	0.068	0.039	0.183	GSK3B	NM_002093	intron			-
rs1732170	3	121066366	35	0.297	0.461	0.025	GSK3B	NM_002093	intron			-
rs1719895	3	121078193	35	0.068	0.039	0.225	GSK3B	NM_002093	intron			-
rs7617372	3	121102020	35	0.237	0.05	0.383	GSK3B	NM_002093	intron			-
rs1574154	3	121109937	35	0.059	0.494	0.358	GSK3B	NM_002093	intron			-
rs4072520	3	121118083	35	0.237	0.05	0.417	GSK3B	NM_002093	intron			-
rs6438553	3	121122719	35	0.297	0.456	0.025	GSK3B	NM_002093	intron			-
rs7620750	3	121125871	35	0.237	0.05	0.408	GSK3B	NM_002093	intron			-
rs9873477	3	121128666	35	0.297	0.461	0.025	GSK3B	NM_002093	intron			-
rs9878473	3	121133478	35	0.297	0.456	0.017	GSK3B	NM_002093	intron			-
rs4688046	3	121146560	35	0.059	0.489	0.358	GSK3B	NM_002093	intron			-
rs17810235	3	121157741	35	0.314	0.067	0	GSK3B	NM_002093	intron			-
rs1381841	3	121161492	35	0.161	0	0.017	GSK3B	NM_002093	intron			-
rs10934503	3	121173857	35	0.059	0.494	0.358	GSK3B	NM_002093	intron			-
rs334555	3	121286826	35	0.212	0	0	GSK3B	NM_002093	intron			-
rs334559	3	121292295	35	0.246	0.05	0.425	GSK3B	NM_002093	intron			-
rs334558	3	121295972	35	0.28	0.383	0.017	GSK3B	NM_002093	flanking_5UTR			-
rs3755557	3	121297647	35	0.178	0.128	0.117	GSK3B	NM_002093	flanking_5UTR			-
rs9282641	3	123279458	35	0.076	0.006	0.042	CD86	NM_006889	5UTR			-
rs1129055	3	123321009	35	0.288	0.372	0.117	CD86	NM_175862	coding	non synonymous	A310T (NP_787058)	-
rs4678045	3	123405553	35	0.314	0.072	0.183	CASR	NM_000388	intron			-
rs1965357	3	123451242	35	0.093	0.467	0.2	CASR	NM_000388	intron			-
rs3749208	3	123462974	35	0.271	0.444	0.092	CASR	NM_000388	intron			-
rs2279802	3	123477631	35	0.068	0.461	0.05	CASR	NM_000388	intron			-
rs2270916	3	123483789	35	0.161	0.422	0.075	CASR	NM_000388	intron			-
rs2270917	3	123483936	35	0.331	0.439	0.192	CASR	NM_000388	intron			-
rs1042636	3	123486459	35	0.068	0.461	0.05	CASR	NM_000388	coding	non synonymous	R990G (NP_000379)	-
rs9282690	3	127308636	35	0.051	0.028	0.042	ALDH1L1	NM_012190	intron			-
rs1127717	3	127308757	35	0.153	0.122	0.267	ALDH1L1	NM_012190	coding	non synonymous	D793G (NP_036322)	-
rs2305230	3	127339393	35	0.127	0.222	0.483	ALDH1L1	NM_012190	coding	Synonymous	L395L (NP_036322)	-
rs140696	3	130634787	35	0.093	0.067	0.225	MBD4	NM_003925	coding	Synonymous	G471G (NP_003916)	BER
rs582537	3	161192800	35	0.466	0.261	0.283	IL12A	NM_000882	intron			-
rs1317082	3	170980287	35	0.212	0.35	0.008	MYNN	NM_018657	intron			-
rs3733001	3	188421658	35	0.22	0.278	0.408	MASP1	NM_001879	intron			-
rs1001073	3	188427407	35	0.356	0.122	0.1	MASP1	NM_001879	intron			-
rs3774268	3	188437026	35	0.144	0.083	0.233	MASP1	NM_139125	coding	Synonymous	S445S (NP_624302)	-
rs696405	3	188438925	35	0.407	0.111	0.142	MASP1	NM_139125	flanking_5UTR			-
rs710459	3	188443184	35	0.466	0.411	0.092	MASP1	NM_001879	intron			-
rs698090	3	188447002	35	0.364	0.367	0.4	MASP1	NM_001031849	flanking_3UTR			-
rs3105782	3	188453998	35	0.212	0.183	0.367	MASP1	NM_001879	intron			-
rs1533593	3	188455029	35	0.271	0.306	0	MASP1	NM_001879	intron			-
rs3864099	3	188481640	35	0.322	0.383	0.117	MASP1	NM_001879	intron			-
rs698079	3	188482474	35	0.144	0.139	0.433	MASP1	NM_001879	intron			-
rs4376034	3	188483058	35	0.322	0.389	0.117	MASP1	NM_001879	intron			-
rs698105	3	188486197	35	0.144	0.139	0.442	MASP1	NM_001879	intron			-
rs13094773	3	188486885	35	0.322	0.389	0.117	MASP1	NM_001879	intron			-
rs7609662	3	188489400	35	0.136	0.139	0.25	MASP1	NM_001879	intron			-
rs12635264	3	188489468	35	0.314	0.428	0.117	MASP1	NM_001879	intron			-
rs13089330	3	188492972	35	0.314	0.428	0.05	MASP1	NM_001879	flanking_5UTR			-
rs1474326	3	188925229	35	0.441	0.4	0	BCL6	NM_138931	intron			-
rs3774309	3	188927899	35	0.356	0.15	0.042	BCL6	NM_138931	intron			-
rs1464645	3	188927959	35	0.144	0.072	0.433	BCL6	NM_138931	intron			-
rs3774306	3	188928031	35	0.39	0.222	0.017	BCL6	NM_138931	intron			-
rs3172469	3	188941790	35	0.314	0.261	0.467	BCL6	NM_001706	flanking_3UTR			-
rs17514215	3	191064943	35	0.229	0	0	TP73L	NM_003722	intron			-
rs7653848	3	191068554	35	0.161	0.161	0.375	TP73L	NM_003722	intron			-
rs6789961	3	191069793	35	0.186	0.161	0.367	TP73L	NM_003722	intron			-
rs6790167	3	191069976	35	0.424	0.45	0.35	TP73L	NM_003722	intron			-
rs9840360	3	191073527	35	0.153	0.172	0.442	TP73L	NM_003722	intron			-
rs7613791	3	191082026	35	0.424	0.439	0.392	TP73L	NM_003722	intron			-
rs1345186	3	191086862	35	0.203	0.361	0.283	TP73L	NM_003722	intron			-
rs3856775	3	191091663	35	0.195	0.333	0.292	TP73L	NM_003722	intron			-
TP73L-52	3	191095038	35	0.068	0	0	TP73L	NM_003722	3UTR			-
TP73L-46	3	191097209	35	0.085	0	0	TP73L	NM_003722	3UTR			-
TP73L-47	3	191097338	35	0.144	0.167	0.258	TP73L	NM_003722	3UTR			-
rs3817672	3	197289121	35	0.407	0.161	0.15	TFRC	NM_003234	coding	non synonymous	G142S (NP_003225)	-
rs2855262	4	24478245	35	0.373	0.378	0.133	SOD3	NM_003102	3UTR			-
rs7041	4	72983369	35	0.424	0.239	0.1	GC	NM_000583	coding	non synonymous	D432E (NP_000574)	-
rs4073	4	74971059	35	0.398	0.339	0.175	IL8	NM_000584	flanking_5UTR			-
rs2227549	4	74971772	35	0.042	0	0	IL8	NM_000584	intron			-
rs2227306	4	74972090	35	0.39	0.306	0.067	IL8	NM_000584	intron			-
rs698	4	100617967	35	0.483	0.056	0.058	ADH1C	NM_000669	coding	non synonymous	I350F (NP_000660)	-
rs2009181	4	100619725	35	0.195	0.211	0.433	ADH1C	NM_000669	intron			-
rs283411	4	100623135	35	0.051	0	0.05	ADH1C	NM_000669	intron			-
rs2241894	4	100623311	35	0.195	0.211	0.425	ADH1C	NM_000669	coding	Synonymous	T151T (NP_000660)	-
rs17526590	4	100626223	35	0.11	0.044	0	ADH1C	NM_000669	intron			-
rs3774932	4	103781378	35	0.356	0.5	0.217	NFKB1	NM_003998	intron			-
rs3774937	4	103791438	35	0.373	0.389	0.008	NFKB1	NM_003998	intron			-
rs230532	4	103807352	35	0.373	0.4	0.092	NFKB1	NM_003998	intron			-
rs230496	4	103845682	35	0.466	0.428	0.442	NFKB1	NM_003998	intron			-
rs4648059	4	103872790	35	0.068	0.028	0.1	NFKB1	NM_003998	intron			-
rs230547	4	103893462	35	0.059	0.278	0.142	NFKB1	NM_003998	intron			-
rs4444903	4	111191714	35	0.39	0.306	0.233	EGF	NM_001963	5UTR			-
rs2237051	4	111258802	35	0.373	0.328	0.133	EGF	NM_001963	coding	non synonymous	M708I (NP_001954)	-
rs971696	4	111285469	35	0.085	0.439	0.317	EGF	NM_001963	intron			-
rs3217773	4	123096726	35	0.314	0.272	0.058	CCNA2	NM_001237	intron			-
rs1396080	4	123098059	35	0.331	0.294	0.35	CCNA2	NM_001237	intron			-
rs769242	4	123099822	35	0.042	0.072	0	CCNA2	NM_001237	coding	non synonymous	I163V (NP_001228)	-
rs2069763	4	123735087	35	0.331	0.394	0.05	IL2	NM_000586	coding	Synonymous	L38L (NP_000577)	-
rs2069762	4	123735585	35	0.254	0.261	0.017	IL2	NM_000586	flanking_5UTR			-
rs1493013	4	142998067	35	0.492	0.089	0.408	IL15	NM_172175	5UTR			-
rs2254514	4	142998143	35	0.288	0	0.15	IL15	NM_000585	5UTR			-
rs2857261	4	142998242	35	0.415	0.444	0.475	IL15	NM_000585	intron			-
rs1057972	4	143012037	35	0.415	0.444	0.3	IL15	NM_000585	3UTR			-
rs10833	4	143012152	35	0.398	0.089	0.1	IL15	NM_000585	3UTR			-
rs2676330	4	153623112	35	0.263	0.467	0.083	FBXW7	NM_018315	intron			-
rs2714804	4	153628569	35	0.314	0	0	FBXW7	NM_018315	intron			-
rs2676329	4	153633000	35	0.263	0.467	0.008	FBXW7	NM_018315	flanking_5UTR			-
rs2714805	4	153652480	35	0.229	0.444	0.342	FBXW7	NM_001013415	flanking_3UTR			-
rs2292743	4	153690705	35	0.263	0.472	0.233	FBXW7	NM_033632	intron			-
rs4696480	4	154964731	35	0.475	0.406	0.375	TLR2	NM_003264	intron			-
rs3804099	4	154982261	35	0.441	0.328	0.375	TLR2	NM_003264	coding	Synonymous	N199N (NP_003255)	-
rs3804100	4	154983014	35	0.051	0.283	0.067	TLR2	NM_003264	coding	Synonymous	S450S (NP_003255)	-
rs6948	4	185924279	35	0.466	0.211	0.317	CASP3	NM_004346	3UTR			-
rs1049216	4	185925238	35	0.254	0.217	0.075	CASP3	NM_004346	3UTR			-
rs1405938	4	185931767	35	0.212	0	0.042	CASP3	NM_004346	intron			-
rs3087455	4	185936326	35	0.271	0.361	0.075	CASP3	NM_004346	intron			-
AHRR-10	5	490862	35	0.39	0	0	AHRR	NM_020731	flanking_3UTR			-
rs10078	5	491102	35	0.203	0.417	0.217	AHRR	NM_020731	flanking_3UTR			-
SLC6A18-13	5	1296599	35	0.068	0	0	SLC6A18	NM_182632	intron			-
rs2853690	5	1306744	35	0.127	0	0.308	TERT	NM_198253	3UTR			-
rs2075786	5	1319310	35	0.39	0.261	0.375	TERT	NM_003219	intron			-
rs13167280	5	1333477	35	0.11	0.144	0.008	TERT	NM_003219	intron			-
rs2853677	5	1340194	35	0.458	0.328	0.275	TERT	NM_003219	intron			-
rs2735940	5	1349486	35	0.424	0.433	0.425	TERT	NM_003219	flanking_5UTR			-
rs1801075	5	1370949	35	0.144	0.056	0.175	TERT	NM_003219	flanking_5UTR			-
rs6347	5	1464412	35	0.263	0.083	0.383	SLC6A3	NM_001044	coding	Synonymous	S405S (NP_001035)	-
rs460700	5	1482969	35	0.305	0.494	0.367	SLC6A3	NM_001044	intron			-
rs2652511	5	1499389	35	0.466	0.172	0.3	SLC6A3	NM_001044	flanking_5UTR			-
rs6413429	5	1500027	35	0.102	0.011	0.025	SLC6A3	NM_001044	flanking_5UTR			-
rs2287779	5	7942216	35	0.042	0.183	0.008	MTRR	NM_024010	coding	Synonymous	L412L (NP_076915)	-
rs2287780	5	7942304	35	0.042	0.183	0.008	MTRR	NM_024010	coding	non synonymous	R442C (NP_076915)	-
rs10380	5	7950191	35	0.203	0.156	0.375	MTRR	NM_024010	coding	non synonymous	H622Y (NP_076915)	-
rs1802059	5	7950319	35	0.263	0.078	0.208	MTRR	NM_024010	coding	Synonymous	A637A (NP_002445)	-
rs9332	5	7953712	35	0.229	0.156	0.458	MTRR	NM_024010	3UTR			-
rs8659	5	7953833	35	0.458	0.311	0.492	MTRR	NM_024010	3UTR			-
rs2278008	5	34025275	35	0.229	0.156	0.192	AMACR	NM_014324	coding	non synonymous	E277K (NP_055139)	-
rs6863657	5	34030491	35	0.085	0	0	AMACR	NM_014324	intron			-
rs840409	5	34030700	35	0.076	0.144	0.083	AMACR	NM_014324	intron			-
rs34677	5	34034525	35	0.093	0.139	0.083	AMACR	NM_014324	coding	non synonymous	V186F (NP_976316)	-
rs2287939	5	34034640	35	0.271	0.15	0.208	AMACR	NM_014324	coding	Synonymous	I147I (NP_976316)	-
rs10941112	5	34040464	35	0.381	0.367	0	AMACR	NM_014324	coding	non synonymous	G175D (NP_055139)	-
rs34689	5	34043466	35	0.11	0.139	0.475	AMACR	NM_014324	intron			-
rs3195676	5	34043857	35	0.373	0.367	0.117	AMACR	NM_014324	coding	non synonymous	V9M (NP_055139)	-
rs1494555	5	35906947	35	0.254	0.494	0.033	IL7R	NM_002185	coding	non synonymous	V138I (NP_002176)	-
rs7737000	5	35907030	35	0.153	0.144	0.117	IL7R	NM_002185	coding	Synonymous	H165H (NP_002176)	-
rs2972395	5	42436063	35	0.102	0	0.133	GHR	NM_000163	flanking_5UTR			-
rs2940930	5	42441268	35	0.398	0.45	0.167	GHR	NM_000163	flanking_5UTR			-
rs7732059	5	42459229	35	0.322	0.006	0.358	GHR	NM_000163	flanking_5UTR			-
rs1858136	5	42471866	35	0.102	0.106	0.192	GHR	NM_000163	flanking_5UTR			-
rs2972418	5	42519450	35	0.475	0.133	0.35	GHR	NM_000163	intron			-
rs2972419	5	42519634	35	0.119	0	0.15	GHR	NM_000163	intron			-
rs2940944	5	42524899	35	0.466	0.133	0.492	GHR	NM_000163	intron			-
rs2972392	5	42531592	35	0.449	0.133	0.492	GHR	NM_000163	intron			-
GHR-113	5	42531815	35	0.246	0.006	0.1	GHR	NM_000163	intron			-
rs2940913	5	42535374	35	0.466	0.133	0.342	GHR	NM_000163	intron			-
rs7735889	5	42597956	35	0.331	0.144	0.375	GHR	NM_000163	intron			-
rs7712701	5	42605947	35	0.331	0	0.292	GHR	NM_000163	intron			-
GHR-21	5	42630868	35	0.203	0.006	0.492	GHR	NM_000163	intron			-
rs6873545	5	42667021	35	0.254	0.172	0.458	GHR	NM_000163	intron			-
rs4451056	5	42691110	35	0.178	0.022	0.167	GHR	NM_000163	intron			-
rs6878512	5	42703628	35	0.178	0.022	0.233	GHR	NM_000163	intron			-
rs6897530	5	42703694	35	0.246	0.172	0.45	GHR	NM_000163	intron			-
rs6179	5	42735801	35	0.246	0.144	0.433	GHR	NM_000163	coding	Synonymous	G186G (NP_000154)	-
rs2972780	5	42750607	35	0.246	0.144	0.442	GHR	NM_000163	intron			-
rs6180	5	42754996	35	0.492	0.422	0.425	GHR	NM_000163	coding	non synonymous	I544L (NP_000154)	-
rs6413428	5	42836481	35	0.237	0.006	0.333	SEPP1	NM_005410	3UTR			-
rs7579	5	42836565	35	0.271	0.3	0.108	SEPP1	NM_005410	3UTR			-
rs2972388	5	68567009	35	0.39	0.456	0.175	CDK7	NM_001799	coding	Synonymous	N33N (NP_001790)	-
rs2241402	5	74682011	35	0.059	0.189	0.042	HMGCR	NM_000859	intron			-
rs2303151	5	74691207	35	0.059	0.189	0.042	HMGCR	NM_000859	intron			-
rs567754	5	78452172	35	0.297	0.4	0	BHMT	NM_001713	intron			-
rs585800	5	78462964	35	0.314	0.111	0	BHMT	NM_001713	3UTR			-
rs617219	5	78465350	35	0.314	0.406	0.217	BHMT	NM_001713	flanking_3UTR			-
rs865646	5	79978113	35	0.28	0.028	0.283	DHFR	NM_000791	intron			-
DHFR-07	5	79978575	35	0.051	0	0	DHFR	NM_000791	intron			-
rs1650697	5	79986537	35	0.186	0.339	0.05	MSH3	NM_002439	coding	non synonymous	I70V	MMR, SSA
rs1805355	5	80001785	35	0.059	0.439	0.183	MSH3	NM_002439	coding	Synonymous	P222P	MMR, SSA
rs1677649	5	80001953	35	0.237	0.044	0.35	MSH3	NM_002439	intron			MMR, SSA
rs836802	5	80019556	35	0.229	0.033	0.217	MSH3	NM_002439	intron			MMR, SSA
rs3797896	5	80129556	35	0.059	0.4	0.133	MSH3	NM_002439	intron			MMR, SSA
rs32983	5	80156117	35	0.339	0	0.008	MSH3	NM_002439	intron			MMR, SSA
rs26279	5	80204693	35	0.22	0.289	0.4	MSH3	NM_002439	coding	non synonymous	A1036T	MMR, SSA
rs2075685	5	82408421	35	0.449	0.256	0.458	XRCC4	NM_022406	flanking_5UTR			NHEJ
rs2662238	5	82535063	35	0.466	0.278	0.225	XRCC4	NM_022406	intron			NHEJ
rs2891980	5	82678419	35	0.102	0.333	0.492	XRCC4	NM_022406	intron			NHEJ
rs3777015	5	82684639	35	0.042	0.1	0	XRCC4	NM_022406	intron			NHEJ
rs1805377	5	82684699	35	0.102	0.328	0.475	XRCC4	NM_022406	intron			NHEJ
rs2266690	5	86731030	35	0.203	0.083	0.05	CCNH	NM_001239	coding	non synonymous	V270A (NP_001230)	-
rs3093816	5	86733143	35	0.441	0.422	0.175	CCNH	NM_001239	intron			-
rs2229992	5	112190753	35	0.398	0.272	0.075	APC	NM_000038	coding	Synonymous	Y486Y (NP_000029)	-
rs2909786	5	112195964	35	0.458	0.161	0.458	APC	NM_000038	intron			-
rs41115	5	112203669	35	0.39	0.161	0.467	APC	NM_000038	coding	Synonymous	T1493T (NP_000029)	-
rs866006	5	112204458	35	0.39	0.161	0.467	APC	NM_000038	coding	Synonymous	S1756S (NP_000029)	-
rs459552	5	112204655	35	0.22	0.089	0	APC	NM_000038	coding	non synonymous	V1822D (NP_000029)	-
rs2451818	5	118788314	35	0.458	0.044	0.233	HSD17B4	NM_000414	flanking_5UTR			-
rs384346	5	118797373	35	0.161	0.044	0.008	HSD17B4	NM_000414	flanking_5UTR			-
rs7737181	5	118847574	35	0.441	0.05	0.3	HSD17B4	NM_000414	intron			-
rs2546210	5	118855500	35	0.373	0.5	0.483	HSD17B4	NM_000414	intron			-
rs32659	5	118870911	35	0.449	0.494	0.292	HSD17B4	NM_000414	intron			-
rs17145464	5	118895072	35	0.432	0.4	0	HSD17B4	NM_000414	intron			-
rs3797372	5	118898351	35	0.398	0.4	0.042	HSD17B4	NM_000414	intron			-
rs246965	5	118918814	35	0.398	0.494	0.333	HSD17B4	NM_000414	flanking_3UTR			-
rs40401	5	131424377	35	0.212	0.439	0.292	IL3	NM_000588	coding	non synonymous	P27S (NP_000579)	-
rs25882	5	131439359	35	0.203	0.383	0.408	CSF2	NM_000758	coding	non synonymous	I117T (NP_000749)	-
rs839	5	131847025	35	0.39	0.306	0.45	IRF1	NM_002198	3UTR			-
rs9282763	5	131850032	35	0.39	0.306	0.45	IRF1	NM_002198	intron			-
rs1881457	5	132020308	35	0.203	0.267	0.167	IL13	NM_002188	flanking_5UTR			-
rs1800925	5	132020708	35	0.195	0.15	0.483	IL13	NM_002188	flanking_5UTR			-
rs1295686	5	132023742	35	0.237	0.294	0.283	IL13	NM_002188	intron			-
rs20541	5	132023863	35	0.237	0.294	0.158	IL13	NM_002188	coding	non synonymous	Q144R (NP_002179)	-
rs2243248	5	132036543	35	0.085	0.033	0.117	IL4	NM_000589	flanking_5UTR			-
rs2243250	5	132037053	35	0.161	0.244	0.167	IL4	NM_000589	flanking_5UTR			-
rs2070874	5	132037609	35	0.161	0.239	0.467	IL4	NM_000589	5UTR			-
rs2243268	5	132041862	35	0.161	0.25	0.25	IL4	NM_000589	intron			-
rs2243290	5	132046068	35	0.161	0.25	0.375	IL4	NM_000589	intron			-
rs1042124	5	137695244	35	0.212	0.028	0	CDC25C	NM_001790	5UTR			-
rs11738738	5	138696085	35	0.297	0.233	0.017	MATR3	NM_199189	flanking_3UTR			-
rs6596471	5	138733487	35	0.237	0.256	0.308	SLC23A1	NM_005847	intron			-
rs4257763	5	138742058	35	0.339	0.361	0.008	SLC23A1	NM_005847	intron			-
SLC23A1-05	5	138743829	35	0.059	0.006	0.117	SLC23A1	NM_005847	coding	non synonymous	V264M	-
rs10063949	5	138747425	35	0.373	0.394	0.117	SLC23A1	NM_005847	flanking_5UTR			-
rs4315920	5	138773584	35	0.297	0.4	0.267	DNAJC18	NM_152686	flanking_3UTR			-
rs801460	5	139912114	35	0.492	0.456	0.217	APBB3	NM_006051	flanking_3UTR			-
rs801459	5	139913807	35	0.271	0.311	0.025	APBB3	NM_006051	flanking_3UTR			-
rs10463297	5	139916423	35	0.407	0.494	0	APBB3	NM_006051	flanking_3UTR			-
rs2569190	5	139993100	35	0.483	0.478	0.308	CD14	NM_000591	flanking_5UTR			-
rs10079250	5	149430325	35	0.068	0.278	0.092	CSF1R	NM_005211	coding	non synonymous	H362R (NP_005202)	-
rs3829987	5	149437004	35	0.042	0.2	0.467	CSF1R	NM_005211	intron			-
rs2228422	5	149437871	35	0.398	0.228	0.3	CSF1R	NM_005211	coding	Synonymous	T242T (NP_005202)	-
rs2042235	5	150378107	35	0.212	0.111	0.417	GPX3	NM_002084	flanking_5UTR			-
rs1946234	5	150379403	35	0.059	0.161	0.242	GPX3	NM_002084	flanking_5UTR			-
rs8177404	5	150379777	35	0.059	0.15	0.242	GPX3	NM_002084	flanking_5UTR			-
rs8177426	5	150383133	35	0.212	0.094	0.425	GPX3	NM_002084	intron			-
rs869975	5	150386565	35	0.051	0.417	0	GPX3	NM_002084	intron			-
rs8177447	5	150387649	35	0.212	0.039	0.375	GPX3	NM_002084	intron			-
rs736775	5	150389541	35	0.322	0.294	0.492	TNIP1	NM_006058	flanking_3UTR			-
rs2277940	5	150389670	35	0.051	0.417	0.017	TNIP1	NM_006058	flanking_3UTR			-
rs3212227	5	158675528	35	0.229	0.45	0.3	IL12B	NM_002187	3UTR			-
rs730690	5	158688744	35	0.229	0.439	0.308	IL12B	NM_002187	intron			-
rs5326	5	174802802	35	0.136	0.239	0.183	DRD1	NM_000794	intron			-
rs6928414	6	1551773	35	0.068	0.022	0.158	FOXC1	NM_001453	flanking_5UTR			-
FOXC1-09	6	1552034	35	0.068	0.017	0.15	FOXC1	NM_001453	flanking_5UTR			-
rs2235716	6	1552115	35	0.356	0.306	0.45	FOXC1	NM_001453	flanking_5UTR			-
rs2235718	6	1552602	35	0.076	0.25	0.042	FOXC1	NM_001453	flanking_5UTR			-
rs9405496	6	1553630	35	0.093	0.244	0.025	FOXC1	NM_001453	flanking_5UTR			-
rs984253	6	1558528	35	0.407	0.117	0	FOXC1	NM_001453	flanking_3UTR			-
rs2745599	6	1558685	35	0.441	0.133	0.083	FOXC1	NM_001453	flanking_3UTR			-
rs5369	6	12402244	35	0.093	0	0.217	EDN1	NM_001955	coding	Synonymous	E106E (NP_001946)	-
rs5370	6	12404241	35	0.246	0.306	0.2	EDN1	NM_001955	coding	non synonymous	K198N (NP_001946)	-
rs1799945	6	26199158	35	0.144	0.033	0	HFE	NM_000410	coding	non synonymous	H63D (NP_000401)	-
rs1572982	6	26202346	35	0.458	0.2	0.392	HFE	NM_139006	flanking_5UTR			-
rs707889	6	26203910	35	0.195	0.106	0.292	HFE	NM_000410	flanking_3UTR			-
rs3093546	6	31648121	35	0.051	0.006	0	LTA	NM_000595	5UTR			-
rs909253	6	31648292	35	0.364	0.428	0.483	LTA	NM_000595	intron			-
rs1799964	6	31650287	35	0.212	0.189	0.142	TNF	NM_000594	flanking_5UTR			-
rs1800630	6	31650455	35	0.161	0.161	0.117	TNF	NM_000594	flanking_5UTR			-
rs1800629	6	31651010	35	0.22	0.028	0.067	TNF	NM_000594	flanking_5UTR			-
rs3093661	6	31651737	35	0.042	0.028	0	TNF	NM_000594	intron			-
rs2072915	6	33270060	35	0.305	0.228	0.475	RXRB	NM_021976	3UTR			-
rs2076310	6	33274012	35	0.22	0.367	0.358	RXRB	NM_021976	intron			-
rs210135	6	33648670	35	0.314	0.217	0.258	BAK1	NM_001188	3UTR			-
rs513349	6	33649697	35	0.356	0.3	0.292	BAK1	NM_001188	intron			-
rs210145	6	33655418	35	0.347	0.3	0.325	BAK1	NM_001188	intron			-
rs262933	6	37242354	35	0.305	0.128	0.433	PIM1	NM_002648	flanking_5UTR			-
rs1757000	6	37243144	35	0.28	0.122	0.408	PIM1	NM_002648	flanking_5UTR			-
rs12197850	6	37249940	35	0.068	0	0	PIM1	NM_002648	3UTR			-
rs10507	6	37250400	35	0.322	0.061	0.408	PIM1	NM_002648	3UTR			-
rs9529	6	42010985	35	0.347	0.239	0	CCND3	NM_001760	3UTR			-
rs2479717	6	42013152	35	0.347	0.111	0	CCND3	NM_001760	intron			-
rs1005230	6	43844474	35	0.407	0.294	0.117	VEGF	NM_003376	flanking_5UTR			-
rs25648	6	43846955	35	0.153	0.111	0.058	VEGF	NM_003376	5UTR			-
rs3025039	6	43860514	35	0.186	0.172	0.067	VEGF	NM_003376	flanking_3UTR			-
rs2282151	6	44334173	35	0.195	0.456	0.017	NFKBIE	NM_004556	3UTR			-
rs730775	6	44340052	35	0.424	0.417	0.05	NFKBIE	NM_004556	intron			-
rs513688	6	44343668	35	0.339	0.406	0.275	NFKBIE	NM_004556	flanking_5UTR			-
rs483536	6	44343831	35	0.331	0.394	0.267	NFKBIE	NM_004556	flanking_5UTR			-
rs405729	6	52950740	35	0.475	0.172	0.475	GSTA4	NM_001512	3UTR			-
rs367836	6	52951090	35	0.424	0.172	0.417	GSTA4	NM_001512	3UTR			-
rs543613	6	52951483	35	0.076	0	0.058	GSTA4	NM_001512	intron			-
rs4986947	6	52957189	35	0.093	0	0	GSTA4	NM_001512	intron			-
rs6296	6	78228979	35	0.331	0.444	0.242	HTR1B	NM_000863	coding	Synonymous	V287V (NP_000854)	-
rs130058	6	78230000	35	0.22	0.056	0.017	HTR1B	NM_000863	flanking_5UTR			-
rs4986869	6	87851900	35	0.339	0.417	0.225	CGA	NM_000735	flanking_3UTR			-
rs6631	6	87851978	35	0.373	0.478	0.425	CGA	NM_000735	3UTR			-
rs6155	6	87854623	35	0.042	0	0.158	CGA	NM_000735	coding	Synonymous	R5R (NP_000726)	-
rs932742	6	87861404	35	0.28	0.411	0.05	CGA	NM_000735	intron			-
rs498251	6	117745959	35	0.169	0.083	0	ROS1	NM_002944	intron			-
rs497186	6	117746112	35	0.169	0.083	0	ROS1	NM_002944	intron			-
rs581235	6	117756681	35	0.169	0.122	0.1	ROS1	NM_002944	intron			-
rs574664	6	117756824	35	0.169	0.083	0	ROS1	NM_002944	intron			-
rs1998206	6	117832141	35	0.153	0.156	0.108	ROS1	NM_002944	coding	non synonymous	T145P (NP_002935)	-
rs2243377	6	117832315	35	0.076	0.072	0	ROS1	NM_002944	intron			-
rs2243	6	117844083	35	0.297	0.417	0.308	ROS1	NM_002944	intron			-
rs1044498	6	132214061	35	0.136	0.061	0.075	ENPP1	NM_006208	coding	non synonymous	K121Q (NP_006199)	-
rs1044582	6	132253801	35	0.093	0	0.308	ENPP1	NM_006208	3UTR			-
rs11914	6	137561281	35	0.136	0.078	0.05	IFNGR1	NM_000416	coding	Synonymous	S350S (NP_000407)	-
rs3799488	6	137561473	35	0.144	0.228	0	IFNGR1	NM_000416	intron			-
rs488133	6	152217558	35	0.314	0.089	0	ESR1	NM_000125	flanking_5UTR			-
rs2071454	6	152218938	35	0.11	0.283	0.492	ESR1	NM_000125	flanking_5UTR			-
rs9340770	6	152220216	35	0.102	0	0	ESR1	NM_000125	flanking_5UTR			-
rs2077647	6	152221191	35	0.424	0.378	0.483	ESR1	NM_000125	coding	Synonymous	S10S (NP_000116)	-
rs1801132	6	152357636	35	0.178	0.489	0.067	ESR1	NM_000125	coding	Synonymous	P325P (NP_000116)	-
rs2273206	6	152474425	35	0.059	0.278	0.367	ESR1	NM_000125	intron			-
rs2228480	6	152512209	35	0.153	0.139	0.108	ESR1	NM_000125	coding	Synonymous	T594T (NP_000116)	-
rs3798577	6	152513244	35	0.483	0.389	0.417	ESR1	NM_000125	3UTR			-
rs3798758	6	152513968	35	0.042	0.278	0.1	ESR1	NM_000125	3UTR			-
rs2295231	6	153457462	35	0.314	0.483	0.467	RGS17	NM_012419	intron			-
rs3870366	6	153531881	35	0.441	0.167	0.45	RGS17	NM_012419	intron			-
rs1799971	6	154452911	35	0.169	0.422	0	OPRM1	NM_000914	coding	non synonymous	N40D (NP_000905)	-
rs607759	6	154464551	35	0.178	0.039	0.05	OPRM1	NM_000914	intron			-
rs9282821	6	154506489	35	0.398	0.206	0.383	OPRM1	NM_000914	intron			-
rs562859	6	154506687	35	0.339	0.1	0.4	OPRM1	NM_000914	intron			-
rs3123109	6	159172593	35	0.297	0.156	0.333	VIL2	NM_003379	intron			-
rs901369	6	159179621	35	0.169	0.183	0.025	VIL2	NM_003379	intron			-
rs1799725	6	160084283	35	0.441	0.117	0.367	SOD2	NM_001024465	coding	non synonymous	V16A (NP_000627)	-
rs5746081	6	160085865	35	0.042	0	0	SOD2	NM_001024465	flanking_5UTR			-
rs1570070	6	160424389	35	0.331	0.244	0.3	IGF2R	NM_000876	coding	Synonymous	S350S (NP_000867)	-
rs998075	6	160438689	35	0.424	0.278	0.342	IGF2R	NM_000876	coding	Synonymous	T713T (NP_000867)	-
rs998074	6	160438794	35	0.424	0.278	0.35	IGF2R	NM_000876	intron			-
rs629849	6	160464820	35	0.186	0.144	0	IGF2R	NM_000876	coding	non synonymous	R1619G (NP_000867)	-
rs2282140	6	160464932	35	0.11	0.233	0.183	IGF2R	NM_000876	intron			-
rs1803989	6	160487892	35	0.068	0.483	0.283	IGF2R	NM_000876	coding	Synonymous	L2222L (NP_000867)	-
rs6463524	7	5810221	35	0.178	0.061	0.092	PMS2	NM_000535	coding	Synonymous	S260S (NP_000526)	MMR
rs2345060	7	5812370	35	0.22	0.061	0.2	PMS2	NM_000535	intron			MMR
rs3735295	7	5821797	35	0.186	0.156	0.383	PMS2	NM_000535	intron			MMR
rs2009115	7	5825797	35	0.144	0.094	0.142	JTV1	NM_006303	intron			-
rs2303364	7	6214928	35	0.042	0.461	0.033	RAC1	NM_006908	intron			-
rs7796976	7	17111670	35	0.203	0.372	0.108	AHR	NM_001621	5UTR			-
rs2074113	7	17147011	35	0.093	0.417	0.158	AHR	NM_001621	intron			-
rs2066853	7	17152350	35	0.093	0.428	0.425	AHR	NM_001621	coding	non synonymous	R554K (NP_001612)	-
rs1800797	7	22539461	35	0.492	0	0	IL6	NM_000600	flanking_5UTR			-
rs1800795	7	22539885	35	0.475	0	0	IL6	NM_000600	flanking_5UTR			-
rs4619	7	45705909	35	0.297	0.483	0.425	IGFBP1	NM_000596	coding	non synonymous	I253M (NP_000587)	-
rs2471551	7	45730295	35	0.28	0.028	0.183	IGFBP3	NM_000598	flanking_5UTR			-
rs1056663	7	47778202	35	0.458	0.467	0.267	HUS1	NM_004507	coding	Synonymous	A278A (NP_004498)	-
rs2242478	7	47791229	35	0.449	0.461	0.275	HUS1	NM_004507	intron			-
rs2017000	7	55016818	35	0.305	0.433	0.067	EGFR	NM_005228	intron			-
rs1140475	7	55040626	35	0.119	0.067	0.017	EGFR	NM_005228	coding	Synonymous	T903T (NP_005219)	-
rs2293347	7	55043125	35	0.127	0.25	0.008	EGFR	NM_005228	coding	Synonymous	D994D (NP_005219)	-
rs1211152	7	86859765	35	0.11	0	0	ABCB1	NM_000927	intron			-
rs2235074	7	86869697	35	0.051	0.072	0.142	ABCB1	NM_000927	intron			-
rs9282564	7	86874091	35	0.102	0	0	ABCB1	NM_000927	coding	non synonymous	N21D (NP_000918)	-
rs1801197	7	92700404	35	0.288	0.083	0.417	CALCR	NM_001742	coding	non synonymous	L447P (NP_001733)	-
rs2074122	7	92717322	35	0.11	0.45	0.033	CALCR	NM_001742	intron			-
rs12360	7	98947745	35	0.068	0.3	0.25	CYP3A7	NM_000765	3UTR			-
CYP3A4-57	7	99035585	35	0.042	0	0	CYP3A4	NM_017460	flanking_5UTR			-
rs6950798	7	115755536	35	0.288	0.011	0.442	CAV1	NM_001753	flanking_5UTR			-
rs10257125	7	115756257	35	0.288	0.011	0.45	CAV1	NM_001753	flanking_5UTR			-
CAV1-23	7	115756570	35	0.085	0	0	CAV1	NM_001753	flanking_5UTR			-
rs2215448	7	115757903	35	0.153	0.067	0.225	CAV1	NM_001753	flanking_5UTR			-
rs8713	7	115793748	35	0.186	0.011	0.392	CAV1	NM_001753	3UTR			-
rs1049334	7	115794331	35	0.093	0.25	0.033	CAV1	NM_001753	3UTR			-
rs1049337	7	115794538	35	0.254	0.489	0.017	CAV1	NM_001753	3UTR			-
rs11762213	7	115933233	35	0.059	0	0	MET	NM_000245	coding	Synonymous	A48A (NP_000236)	-
MET-26	7	115933623	35	0.068	0.044	0.117	MET	NM_000245	coding	Synonymous	S178S	-
rs13223756	7	115991523	35	0.161	0.222	0.108	MET	NM_000245	coding	Synonymous	Q648Q (NP_000236)	-
rs41736	7	116029719	35	0.407	0.444	0.017	MET	NM_000245	coding	Synonymous	D1286D (NP_000236)	-
rs727506	7	124055978	35	0.364	0.489	0.317	POT1	NM_015450	flanking_3UTR			-
rs10250202	7	124059460	35	0.364	0.472	0.317	POT1	NM_015450	intron			-
rs10244817	7	124061421	35	0.288	0.322	0.017	POT1	NM_015450	intron			-
rs10263573	7	124063218	35	0.364	0.472	0.317	POT1	NM_015450	intron			-
rs7784168	7	124085989	35	0.339	0.206	0.408	POT1	NM_015450	intron			-
rs6959712	7	124092954	35	0.364	0.472	0.308	POT1	NM_015450	intron			-
POT1-03	7	124132946	35	0.339	0.206	0.408	POT1	NM_015450	flanking_5UTR			-
rs2167270	7	127475300	35	0.314	0.217	0.492	LEP	NM_000230	5UTR			-
rs2072574	7	129731643	35	0.466	0.394	0.033	MEST	NM_177524	intron			-
rs3918226	7	150127824	35	0.11	0	0	NOS3	NM_000603	intron			-
rs1799983	7	150133759	35	0.347	0.089	0.067	NOS3	NM_000603	coding	non synonymous	D298E (NP_000594)	-
rs2069456	7	150190256	35	0.237	0.322	0.158	CDK5	NM_004935	intron			-
rs2069442	7	150192853	35	0.254	0.3	0.433	CDK5	NM_004935	flanking_5UTR			-
rs1549760	7	150193487	35	0.229	0.294	0.2	CDK5	NM_004935	flanking_5UTR			-
rs6464120	7	150195045	35	0.153	0.044	0.025	SLC4A2	NM_003040	intron			-
rs10245199	7	150196130	35	0.237	0.294	0.367	SLC4A2	NM_003040	intron			-
rs13240966	7	150196466	35	0.195	0.017	0.125	SLC4A2	NM_003040	intron			-
rs6992432	8	9447392	35	0.102	0.144	0.233	TNKS	NM_003747	flanking_5UTR			-
TNKS-01	8	9451459	35	0.246	0.389	0.208	TNKS	NM_003747	coding	Synonymous	R200R	-
TNKS-03	8	9451647	35	0.203	0.394	0.167	TNKS	NM_003747	intron			-
TNKS-05	8	9451913	35	0.246	0.417	0.358	TNKS	NM_003747	intron			-
TNKS-46	8	9452049	35	0.068	0.006	0	TNKS	NM_003747	intron			-
rs7462102	8	9498778	35	0.186	0.35	0.383	TNKS	NM_003747	intron			-
rs7464476	8	9498843	35	0.127	0.256	0.258	TNKS	NM_003747	intron			-
TNKS-64	8	9510835	35	0.068	0.1	0.108	TNKS	NM_003747	intron			-
TNKS-35	8	9521842	35	0.068	0.089	0.092	TNKS	NM_003747	intron			-
TNKS-36	8	9532142	35	0.169	0.322	0.35	TNKS	NM_003747	intron			-
rs13276464	8	9549519	35	0.102	0.222	0.1	TNKS	NM_003747	intron			-
rs6985140	8	9574837	35	0.068	0.106	0.125	TNKS	NM_003747	intron			-
rs11249938	8	9582196	35	0.195	0.283	0.267	TNKS	NM_003747	intron			-
rs7006985	8	9601847	35	0.305	0.428	0.45	TNKS	NM_003747	coding	Synonymous	T462T (NP_003738)	-
rs12542457	8	9602010	35	0.297	0.428	0.45	TNKS	NM_003747	intron			-
rs6601361	8	9617153	35	0.195	0.294	0.425	TNKS	NM_003747	intron			-
rs7462910	8	9617396	35	0.195	0.294	0.425	TNKS	NM_003747	intron			-
rs7001395	8	9628165	35	0.059	0.106	0.15	TNKS	NM_003747	intron			-
rs9644708	8	9638327	35	0.271	0.45	0	TNKS	NM_003747	intron			-
TNKS-26	8	9660580	35	0.085	0.156	0.158	TNKS	NM_003747	intron			-
rs1065712	8	11739531	35	0.085	0	0	CTSB	NM_001908	3UTR			-
rs971594	8	16051548	35	0.373	0.006	0.108	MSR1	NM_138715	intron			-
rs414580	8	16079673	35	0.119	0.433	0.375	MSR1	NM_138715	intron			-
rs263	8	19857092	35	0.169	0.239	0.4	LPL	NM_000237	intron			-
rs316	8	19862716	35	0.093	0.089	0.142	LPL	NM_000237	coding	Synonymous	T388T (NP_000228)	-
rs325	8	19863608	35	0.127	0.117	0.033	LPL	NM_000237	intron			-
rs326	8	19863719	35	0.254	0.206	0.375	LPL	NM_000237	intron			-
rs327	8	19863816	35	0.254	0.206	0.342	LPL	NM_000237	intron			-
rs328	8	19864004	35	0.127	0.117	0.033	LPL	NM_000237	coding	non synonymous	S474* (NP_000228)	-
rs1059507	8	19868243	35	0.11	0.089	0.075	LPL	NM_000237	3UTR			-
rs2235126	8	23113126	35	0.254	0.289	0.15	TNFRSF10A	NM_003844	intron			-
rs4871857	8	23115269	35	0.398	0.022	0.242	TNFRSF10A	NM_003844	coding	non synonymous	R209T (NP_003835)	-
rs1126452	8	27457881	35	0.263	0.383	0.2	EPHX2	NM_001979	coding	Synonymous	P531P (NP_001970)	-
rs1042032	8	27457991	35	0.263	0.328	0.2	EPHX2	NM_001979	3UTR			-
rs4987236	8	31041477	35	0.102	0.017	0.2	WRN	NM_000553	coding	non synonymous	V114I (NP_000544)	BER, HR
rs2725349	8	31044099	35	0.28	0.117	0.483	WRN	NM_000553	coding	Synonymous	C171C (NP_000544)	BER, HR
rs1800392	8	31093499	35	0.449	0.361	0.358	WRN	NM_000553	coding	Synonymous	L787L (NP_000544)	BER, HR
rs2725362	8	31118822	35	0.449	0.361	0.483	WRN	NM_000553	coding	non synonymous	L1074F (NP_000544)	BER, HR
rs1346044	8	31144196	35	0.237	0.072	0.142	WRN	NM_000553	coding	non synonymous	C1367R (NP_000544)	BER, HR
rs3136717	8	42315598	35	0.102	0.133	0.208	POLB	NM_002690	intron			BER
rs2979895	8	42319364	35	0.068	0.133	0.267	POLB	NM_002690	intron			BER
rs2953983	8	42332413	35	0.059	0.133	0.258	POLB	NM_002690	intron			BER
rs1129660	8	53699869	35	0.22	0.328	0.033	RB1CC1	NM_014781	coding	Synonymous	L1556L (NP_055596)	-
rs2305427	8	53717622	35	0.22	0.328	0.033	RB1CC1	NM_014781	coding	Synonymous	R1393R (NP_055596)	-
rs17337252	8	53749259	35	0.432	0.167	0.125	RB1CC1	NM_014781	coding	non synonymous	M234T (NP_055596)	-
RB1CC1-50	8	53790556	35	0.051	0	0	RB1CC1	NM_014781	flanking_5UTR			-
rs1031552	8	64095744	35	0.042	0.339	0.133	GGH	NM_003878	intron			-
rs719235	8	64114235	35	0.331	0.128	0.008	GGH	NM_003878	flanking_5UTR			-
rs1451868	8	65662040	35	0.22	0.344	0.158	CYP7B1	NM_004820	flanking_3UTR			-
rs1376772	8	65662127	35	0.11	0.344	0.267	CYP7B1	NM_004820	flanking_3UTR			-
rs3779870	8	65681720	35	0.331	0.489	0.233	CYP7B1	NM_004820	intron			-
CYP7B1-06	8	65682394	35	0.068	0	0.017	CYP7B1	NM_004820	intron			-
rs10106086	8	74056488	35	0.373	0.067	0.375	TERF1	NM_003218	flanking_5UTR			-
TERF1-02	8	74105266	35	0.195	0.111	0.125	TERF1	NM_017489	flanking_3UTR			-
rs2306494	8	74113781	35	0.339	0.261	0.417	TERF1	NM_003218	intron			-
rs2306492	8	74114456	35	0.339	0.261	0.417	TERF1	NM_003218	intron			-
rs3863242	8	74120587	35	0.466	0.15	0.283	TERF1	NM_003218	intron			-
rs1063053	8	91016713	35	0.305	0.361	0.167	NBN	NM_002485	3UTR			MMEJ, HR
rs867185	8	91044326	35	0.356	0.361	0.242	NBN	NM_002485	intron			MMEJ, HR
rs1805794	8	91059655	35	0.288	0.467	0.158	NBN	NM_002485	coding	non synonymous	E185Q (NP_002476)	MMEJ, HR
rs1063045	8	91064195	35	0.288	0.467	0.292	NBN	NM_002485	coding	Synonymous	L34L (NP_002476)	MMEJ, HR
rs3891248	8	128819321	35	0.169	0.367	0.208	MYC	NM_002467	intron			-
rs3088440	9	21958159	35	0.11	0.083	0.225	CDKN2A	NM_058197	3UTR			-
rs2518719	9	21960427	35	0.144	0	0.15	CDKN2A	NM_000077	intron			-
rs3731246	9	21961989	35	0.093	0.011	0.142	CDKN2A	NM_000077	flanking_5UTR			-
rs2811708	9	21963422	35	0.246	0.25	0.233	CDKN2A	NM_058197	flanking_3UTR			-
rs3731239	9	21964218	35	0.373	0.094	0	CDKN2A	NM_058197	flanking_3UTR			-
rs2518720	9	21968979	35	0.347	0.339	0.392	CDKN2A	NM_000077	flanking_5UTR			-
rs3731217	9	21974661	35	0.144	0.244	0.108	CDKN2A	NM_058195	flanking_3UTR			-
rs3731211	9	21976847	35	0.263	0.256	0.25	CDKN2A	NM_058195	flanking_3UTR			-
rs3731198	9	21979477	35	0.144	0	0.033	CDKN2A	NM_058195	flanking_3UTR			-
rs3218020	9	21987872	35	0.364	0.461	0.117	CDKN2A	NM_058195	flanking_5UTR			-
rs1127857	9	92963420	35	0.136	0.006	0.042	NINJ1	NM_004148	3UTR			-
rs1127851	9	92963513	35	0.136	0.122	0.383	NINJ1	NM_004148	3UTR			-
rs1800975	9	97539133	35	0.424	0.461	0.233	XPA	NM_000380	5UTR			NER
rs928180	9	98977287	35	0.068	0	0.033	TGFBR1	NM_004612	intron			-
rs334358	9	98990168	35	0.22	0.022	0.117	TGFBR1	NM_004612	intron			-
rs868	9	98991211	35	0.22	0.022	0.108	TGFBR1	NM_004612	3UTR			-
rs2230808	9	104642359	35	0.153	0.339	0.117	ABCA1	NM_005502	coding	non synonymous	K1587R (NP_005493)	-
rs2297404	9	104644021	35	0.076	0.194	0.008	ABCA1	NM_005502	intron			-
rs2777801	9	104646432	35	0.076	0.006	0.208	ABCA1	NM_005502	intron			-
rs4149313	9	104666308	35	0.127	0.378	0.45	ABCA1	NM_005502	coding	non synonymous	I883M (NP_005493)	-
rs7031748	9	104670827	35	0.127	0.367	0.475	ABCA1	NM_005502	coding	Synonymous	I680I (NP_005493)	-
rs2230806	9	104700422	35	0.161	0.433	0.225	ABCA1	NM_005502	coding	non synonymous	R219K (NP_005493)	-
rs1805335	9	107160573	35	0.373	0.306	0.492	RAD23B	NM_002874	intron			NER, BER
rs1805330	9	107163816	35	0.085	0	0.233	RAD23B	NM_002874	intron			NER, BER
rs1805329	9	107163883	35	0.153	0.25	0	RAD23B	NM_002874	coding	non synonymous	A249V (NP_002865)	NER, BER
rs1805334	9	107165704	35	0.203	0.3	0.025	RAD23B	NM_002874	intron			NER, BER
rs1805313	9	113230745	35	0.305	0.439	0.467	ALAD	NM_000031	intron			-
rs8177806	9	113232494	35	0.136	0.056	0.075	ALAD	NM_000031	coding	Synonymous	N147N (NP_000022)	-
rs1139488	9	113233454	35	0.424	0.389	0.233	ALAD	NM_000031	coding	Synonymous	Y65Y (NP_000022)	-
rs5788	9	122223346	35	0.178	0.044	0.267	PTGS1	NM_000962	coding	Synonymous	G213G (NP_542158)	-
rs1330684	9	127659153	35	0.314	0.389	0	ENG	NM_000118	intron			-
rs1330683	9	127659364	35	0.39	0.294	0.483	ENG	NM_000118	intron			-
rs1805352	9	134525894	35	0.271	0.261	0.292	RXRA	NM_002957	intron			-
rs1536475	9	134547101	35	0.169	0.217	0.025	RXRA	NM_002957	intron			-
rs4986945	X	15928124	35	0.22	0.161	0.3	GRPR	NM_005314	coding	Synonymous	S151S (NP_005305)	-
rs4986946	X	15928334	35	0.22	0.161	0.283	GRPR	NM_005314	coding	Synonymous	I221I (NP_005305)	-
rs6610650	X	37392727	35	0.119	0.044	0.425	CYBB	NM_000397	flanking_5UTR			-
rs4422908	X	37397743	35	0.119	0.044	0.183	CYBB	NM_000397	intron			-
rs5964125	X	37414668	35	0.102	0.044	0.117	CYBB	NM_000397	intron			-
rs5964149	X	37425911	35	0.102	0.044	0.183	CYBB	NM_000397	intron			-
rs5964151	X	37426946	35	0.102	0.044	0.383	CYBB	NM_000397	3UTR			-
rs6323	X	43347290	35	0.22	0.3	0.108	MAOA	NM_000240	coding	Synonymous	R297R (NP_000231)	-
rs1204038	X	66571246	35	0.195	0	0	AR	NM_001011645	flanking_5UTR			-
rs2361634	X	66645864	35	0.076	0	0	AR	NM_000044	flanking_5UTR			-
rs1337080	X	66661940	35	0.025	0	0.358	AR	NM_000044	intron			-
rs1337082	X	66767036	35	0.254	0	0.008	AR	NM_000044	flanking_3UTR			-
rs2642219	X	95945551	35	0.169	0.483	0.242	RPA4	NM_013347	coding	non synonymous	A33T (NP_037479)	-
